## Differential modulation of mouse heart gene expression by infection with two *Trypanosoma cruzi* strains: a transcriptome analysis

Castro TBR<sup>§</sup>, Canesso MCC<sup>§</sup>, Boroni M<sup>#</sup>, Chame DF<sup>§</sup>, de Laet Souza D<sup>§</sup>, Toledo NE<sup>§</sup>, Tahara EB<sup>§</sup>, Pena SD<sup>§</sup>, Machado CR<sup>§</sup>, Chiari E<sup>&</sup>, Macedo AM<sup>§\*</sup> and Franco GR<sup>§\*</sup>

<sup>§</sup>Departamento de Bioquímica e Imunologia, UFMG, Belo Horizonte/MG, Brazil; <sup>#</sup>Laboratório de Bioinformática e Biologia Computacional, Centro de Pesquisas, Instituto Nacional do Câncer, Rio de Janeiro, Brazil, <sup>&</sup>Departamento de Parasitologia, UFMG, Belo Horizonte/MG, Brazil

\*Both authors equally contributed to this work

The protozoan *Trypanosoma cruzi* (*T. cruzi*) is a well-adapted parasite to mammalian hosts and the pathogen of Chagas disease in humans. As both host and *T. cruzi* are highly genetically diverse, many variables come into play during infection, making disease outcomes difficult to predict. One important challenge in the field of Chagas disease research is determining the main factors leading to parasite establishment in the chronic stage in some organs, mainly the heart and/or digestive system. Our group previously showed that distinct strains of *T. cruzi* (JG and Col1.7G2) acquired differential tissue distribution in the chronic stage in dually-infected BALB/c mice. To investigate changes in the host triggered by the two distinct *T. cruzi* strains, we assessed the gene expression profile of BALB/c mouse hearts infected with either JG, Col1.7G2 or an equivalent mixture of both parasites during the initial phase of infection. This study demonstrates a clear distinction in host gene expression modulation by both parasites. Col1.7G2 strongly activated Th1-polarized immune signature genes, whereas JG showed only minor activation of the host immune response. Moreover, JG strongly reduced the expression of genes for ribosomal proteins and mitochondrial proteins related to the electron transport chain. Interestingly, evaluation of gene expression in mice inoculated with the mixture of parasites showed expression profiles for both up- and down-regulated genes, indicating the coexistence of both parasite strains in the heart during the acute phase. This study suggests that different strains of *T. cruzi* may be distinguished by their efficiency

- 27 in activating the immune system, modulating host energy and reactive oxygen species production
- 28 and decreasing protein synthesis during early infection, which may be crucial in defining parasite
- 29 persistence in specific organs.

## 31 **Author Summary**

32 The causative agent of Chagas disease, *Trypanosoma cruzi*, retains high genetic diversity, and its  
33 populations vary greatly across geographic locations. The *T. cruzi* mammalian hosts, including  
34 humans, also have high genetic variation, making it difficult to predict the disease outcome.  
35 Accordingly, this variability must be taken into account in several studies aiming to interrogate  
36 the effect of polyparasitism in drug trials, vaccines, diagnosis or basic research. Therefore, there  
37 is a growing need to consider the interaction between the pathogen and the host immune system  
38 in mixed infections. In the present work, we present an in-depth analysis of the gene expression of  
39 hearts from BALB/c mice infected with Col1.7G2 and JG alone or a mixture of both strains.  
40 Col1.7G2 induced a higher Th1 inflammatory response, while JG exhibited a weaker activation of  
41 immune response genes. Furthermore, JG-infected mice showed a notable reduction in the  
42 expression of genes responsible for mitochondrial oxidative phosphorylation and protein  
43 synthesis. Interestingly, the mixture-infected group displayed changes in gene expression as  
44 caused by both strains. Overall, we provided new insights into the host-pathogen interaction in the  
45 context of single and dual infection, showing remarkable differences in host gene expression  
46 modulation by two *T. cruzi* strains.

## 47 **Introduction**

48 Chagas disease (CD) is a parasitic illness caused by the kinetoplastid protozoan *Trypanosoma*  
49 *cruzi*. Six to seven million people are estimated to be compromised by this disease, which affects  
50 mostly poor communities in rural areas of Latin America. [1]. Despite being the prototype of a  
51 neglected tropical disease, CD has recently gained attention in nonendemic areas due to increasing  
52 emigration of affected people from endemic to nonendemic countries, with new cases occurring

53 mainly by infected blood transfusion, organ transplantation and congenital transmission [2-4].  
54 Currently, there are six discrete typing units (DTUs I-VI) described for *T. cruzi*, according to a  
55 series of genetic markers, such as rDNA 24Sα, miniexon and mitochondrial polymorphisms [5-8],  
56 and a seventh has been postulated (Tcbat) [9]. This broad genetic diversity makes *T. cruzi* a highly  
57 complex organism and also plays an essential role in the differential tropism in host tissues, which  
58 culminates in diverse clinical manifestations observed in chronic patients and experimental models  
59 of CD [10-13]. Notably, the term tropism has been used with different meanings by many authors  
60 in the scientific literature [14-16], and here, we refer to tissue tropism as the ability of a particular  
61 pathogen to infect and persist within an organ or set of organs [17].

62 Elucidating the molecular mechanisms dictating the interaction between the pathogen and its host  
63 is crucial for understanding the disease progression and the development of new treatments.  
64 Previously, Andrade *et al.* showed that after inoculating BALB/c mice with a mixture of different  
65 strains of *T. cruzi*, namely, JG (*T. cruzi* I) and Col1.7G2 (*T. cruzi* II), the two parasite strains did  
66 not evenly distribute among different tissues in the chronic phase of the disease. JG was primarily  
67 found in the heart, while Col1.7G2 was encountered in the rectum of the animals [11]. Curiously,  
68 mice infected with only one strain did not exhibit this pronounced tissue tropism. In addition,  
69 different mouse lineages such as C57BL/6J and SWISS were unable to reproduce the  
70 aforementioned tissue tropism, indicating the role of the host in the different behaviors of *T. cruzi*  
71 strains [12]. In parallel, such tropism was also detected in human patients during the chronic phase  
72 of CD, as different organs were the subject of distinct *T. cruzi* DTUs establishment, leading to the  
73 proposition of the 'clonal-histotropic model' hypothesis [10, 11, 18].

74 Recently, extensive research has helped to better understand the immunological and molecular  
75 interaction between *T. cruzi* and its mammalian host. An efficient and non-exaggerated immune

76 response is crucial to pathogen clearance, without much damage to the host tissue [19]. The innate  
77 immune system provides the first line of defense to initiate an effective response against a parasite  
78 via pattern recognition receptors (PRRs), of which the Toll-like receptors (TLRs) are the best  
79 known [20]. Among the most well-studied TLRs in the context of CD are *Tlr-2* and *Tlr-9* [21].  
80 The Glycosylphosphatidylinositol (GPI)-anchored mucin-like glycoproteins (tGPI-mucin), widely  
81 present on the parasite surface, and unmethylated CpG DNA sequences are the primary  
82 immunostimulatory ligands of these TLRs, respectively. They have been recognized to trigger the  
83 release of *Il-12* and *TNF* by dendritic cells and macrophages, which are pivotal for host resistance  
84 at the beginning of the acute phase of CD [22, 23]. Moreover, the establishment of a Th1 response,  
85 which is dependent on the release of *Ifn- $\gamma$* , has been extensively studied and is essential for parasite  
86 control and host survival [21, 24]. However, there is a lack of comparative studies showing the  
87 peculiarities of the host response against distinct strains of *T. cruzi* and their role in differential  
88 parasite tissue preferences. Experiments in mice and rats comparing JG (*T. cruzi* II) and CL-  
89 Brenner (*T. cruzi* VI) have shown remarkable differences in the systemic production of  
90 inflammatory cytokines and inflammatory cells [25, 26]. Even though much has been achieved to  
91 understand the complexity of tissue preferences in the parasite, real changes in host gene  
92 expression during infection with distinct *T. cruzi* strains and mixtures have not yet been  
93 investigated.

94 In the present work, we report a thorough gene expression analysis of BALB/c hearts during the  
95 acute stage of infection by different strains of *T. cruzi* and their mixture. Our data reveals that JG-  
96 infected mice display less pronounced induction of both innate and adaptive immune response  
97 genes in contrast to Col1.7G2-infected mice. Moreover, biological processes such as translation  
98 and mitochondrial oxidative phosphorylation are intensely downregulated in JG, indicating a

99 cellular metabolism modulation that might benefit JG parasites. Remarkably, the mixture-infected  
100 animals showed both profiles simultaneously. Our data demonstrate the complexity of host-  
101 pathogen interactions in the context of experimental CD and how distinct *T. cruzi* strains  
102 differently affect gene expression in mouse hearts.

## 103 **Results and Discussion**

### 104 Differential performance of infection by JG, Col1.7G2 and their mixture in BALB/c 105 mice

106 One critical aspect of distinct *T. cruzi* strains is their high genetic variability and differential  
107 parasitism when infecting a mammal host. Our research group has intensively studied the  
108 Col1.7G2 (*T. cruzi I*) and JG (*T. cruzi II*) strains regarding characteristics of their infection in  
109 different mouse lineages and tissue tropism [12, 13, 27]. For example, the JG strain rarely causes  
110 death in BALB/c mice, while Col1.7G2 presents high virulence, killing these animals during early  
111 moments of infection (Fig 1A). On the other hand, this virulence does not appear to be caused by  
112 parasite burden, since JG display higher parasitemia than Col1.7G2 in the acute phase of our  
113 experiments (Fig 1B). Interestingly, animals infected by an equivalent mixture of both strains  
114 present high parasitemia, and a high mortality rate (Fig 1A-B). Such phenomenon is also noted by  
115 Campos *et al.*, in which BALB/c mice infected by two *T. cruzi I* strains (AQ1-7 and MUTUM)  
116 present undetectable parasitemia, but when coinfecting with JG, a synergic effect in parasitemia is  
117 observed [28]. In general, highly multiplicative intracellular pathogens exacerbate the immune  
118 response and promote early activation of CD8<sup>+</sup> T cells [29]. This effect does not appear to be the  
119 case of JG, since experiments confirmed the presence of lower levels of inflammatory cytokines  
120 in infected mice and rats during the acute phase in comparative studies [25, 26]. A possible  
121 explanation for this diverse mortality and parasitemia levels may be the exacerbation of the

122 inflammatory response by virulent strains, and the remarkable ability to evade the innate  
123 mechanism presented by nonvirulent strains.

124 Currently, the reason for strain preferences for particular tissues is not completely understood. In  
125 humans, it has been suggested that distinct *T. cruzi* strains can prevail in different organs and cause  
126 variable damage to its hosts, culminating in distinct CD outcomes in the chronic phase [10, 11].  
127 Thus, different forms of CD would be dependent on the parasite strain and its tropism for specific  
128 niches and on the host genetic variability, a concept from which the ‘clonal-histotropic model’ for  
129 the pathogenesis of the disease was constructed [30]. Severe chronic manifestations of CD result  
130 from persistence of the intracellular stage of the parasite (amastigotes) in heart and muscle cells,  
131 enteric ganglia, and adipose tissue [31, 32]. It is still a matter of controversy whether *T. cruzi*  
132 parasites exhibit true tissue tropism for heart cells due to tissue-specific protein-protein  
133 interactions in the cell surface, or if differential proliferation and selection by immune system/drug  
134 resistance affect survival and persistence, leading to the outcome observed in chronic stages [33].  
135 At the acute stage of infection, *T. cruzi* parasites can infect virtually any nuclear cell or organ,  
136 bringing the real meaning of the tissue tropism concept to question. We cannot discard the  
137 hypothesis that the differential strain ‘preference’ may represent the consequence of competition  
138 between two or more distinct *T. cruzi* strains for a specific niche, as determined by strain resistance  
139 and adaptation to the immune system. Experiments with Holtzman rats that attested to the  
140 efficiency of the JG strain to persist in the heart, compared to the CL-Brener strain (*T. cruzi* VI),  
141 at the end of the acute phase as well as the chronic phase [26]. It has been suggested that *T. cruzi*  
142 persists preferentially in cells with high rates of fatty acid metabolism, and therefore, those cells  
143 can provide adequate nutrients for the parasites [34]. However, it is interesting to note that cells

144 where *T. cruzi* parasites are predominant in the chronic phase, such as adipocytes, cardiomyocytes,  
145 skeletal fibers, and neurons, are the cells with minor turnover rates in mammals [35] and may  
146 represent tissues that can harbor latent parasites for long periods.

## 147 Heart transcriptome acquisition, quality assessment, and gene clustering

148 To help us to understand the modulation of heart gene expression by parasite infection, we infected  
149 BALB/c mice with the JG, Col1.7G2 and an equal mixture of both strains (Fig 2A). mRNA from  
150 independent biological replicates of each group was sequenced to generate up to 120 million  
151 paired-end reads in total (S1 Table), followed by processing through our RNA-Seq analysis  
152 pipeline (S1 Fig). The tendency within our data was evaluated by executing principal component  
153 analysis (PCA) using the regularized-log (log<sub>2</sub>) transformed data matrix from normalized read  
154 counts. The dimensionality reduction through PCA evidenced the separation between control and  
155 experimental groups by the first principal component. The second principal component separated  
156 Col1.7G2 and JG-infected groups, while the mixed infection were distributed between both  
157 profiles (Fig 2B). The relationship among samples was revealed using a heatmap of the Euclidean  
158 distances between samples. As seen before, experimental and control groups clustered separately,  
159 and Col1.7G2 and JG groups are shown to be distinctive. Interestingly, the mixture group shows  
160 moderate similarity among samples from each infected mouse, but the control group does not (Fig  
161 2C).

## 162 Revealing the Differentially Expressed Genes (DEGs)

163 We found approximately 16,400 genes expressed in mouse hearts in all experimental groups (S2  
164 Table). 2,583 (S3 Table) genes presented a minimum 2-fold change (1 log<sub>2</sub> Fold Change) with a  
165 1% false discovery rate (FDR) when comparing infected groups to the control non-infected groups



166 and were considered differentially expressed genes DEGs. From these, 2,396 genes are protein  
167 coding, 47 are long intervening noncoding RNA (lincRNA), and 140 belong to other biotypes (S4  
168 Table). The distribution of DEGs in each group is represented by volcano plots (Fig 3A-C). It is  
169 worth noting that there are remarkable differences in fold changes of DEGs among groups.  
170 Col1.7G2-infected animals exhibit more upregulated (999 in Col1.7G2 and 729 in JG) and less  
171 downregulated DEGs (145 in Col1.7G2 and 673 in JG) relative to the control group in comparison  
172 to JG infected-animals. Notably, mouse hearts from the mixed infection presented a higher number  
173 of downregulated DEGs (775) and a higher number of upregulated DEGs (1278) relative to the  
174 control group, compared to both single-infected groups.

175 At the acute stage of the mixed infection, it is improbable that many host cells are infected by both  
176 strains, since we inoculated mice with a very low load of parasites in both single and mixed  
177 infections. Therefore, based on the observation that in the acute phase of mixed infection, hearts  
178 present both JG and Col1.7G2 expression patterns, but in the chronic phase, Col1.7G2 seems to  
179 be eliminated from this organ, as seen by Andrade *et al.*, 1999, we suggest that JG proliferates at  
180 a higher rate than Col1.7G2, predominating in the heart in the chronic phase. This hypothesis  
181 corroborates previous reports showing that both JG and Col1.7G2 were detected in the hearts of  
182 dually-infected BALB/c mice by low-stringency PCR in the acute phase of infection, but at the  
183 chronic stage (3 to 6 months after infection), there was a predominance of JG in the hearts of these  
184 animals [12, 13]. Additionally, recent findings by Dias *et al.* demonstrated that Col1.7G2 is less  
185 efficient than JG in proliferating in the cardiomyocytes of neonate BALB/c mice in culture, which  
186 reinforces our hypothesis [36].

187 We asked if the transcriptome profile of infected mice would differ between *T. cruzi* strains. Thus,  
188 we investigated whether DEGs are shared or exclusively expressed in a specific experimental

189 group, as shown in a Venn diagram (Fig 3D). A total of 501 (25%) DEGs are shared among all  
190 groups and can represent genes intrinsically influenced by the *T. cruzi* infection (S5 Table).  
191 Interestingly, for exclusive DEGs, the mixture-infected animals show an equivalent number of up-  
192 and downregulated genes (271 up and 275 down), while JG-infected animals present more  
193 downregulated genes (132 up and 206 down), and Col1.7G2- present more upregulated (131 up  
194 and 55 down) DEGs. Most DEGs from the Mixture-infected group (1507 or 74%) correspond to  
195 DEGs also found in JG- and Col1.7G2- single infected animals. We decided to analyze the  
196 exclusive DEGs from the mixture-infected group (~21%), since it remains an open question  
197 whether a mixed infection leads to exacerbation of the pathological effect of single strains  
198 (synergistic effect) or if it is merely the sum of the impact of both strains [25, 37, 38]. We  
199 concluded that the mixed infection is much more similar to the sum of every infection than  
200 previously understood. We examined the FDR distribution of exclusive DEGs from Col1.7G2, JG  
201 and Mixture-infected groups that were not considered as DEGs in the other groups (Fig 3E).  
202 Notably, an accumulation of mixture-exclusive DEGs close to the threshold to also be considered  
203 a DEG (FDR < 0.01) in the JG or Col1.7G2 groups, but this tendency was not observed for  
204 exclusive JG DEGs present in the Col1.7G2 group and vice-versa, demonstrating that these two  
205 groups are distinct. Thus, it is plausible that these two parasite strains induce different gene  
206 expression responses in the host, and that mixture-infected animals combine cells infected by both  
207 strains. The effect of gene expression modulation in the heart of mixture-infected animals will  
208 depend on how many cells are infected by JG or Col1.7G2, leading to profiles that are more similar  
209 to Col1.7G2 single infection or to JG single infection.

210 Different *T. cruzi* strains stimulate distinct gene expression response in mouse hearts

211 We next asked which biological processes are mainly represented by DEGs, and whether  
212 differences could be detected in the more representative categories when comparing the different  
213 groups. To achieve this, we separately analyzed the genes upregulated and downregulated upon  
214 JG, Col1.7G2, or mixture infection versus uninfected control in mouse hearts for functionally  
215 enriched biological processes (GO - Gene Ontology analysis) (Fig. 4 and S6 Table). For  
216 upregulated genes, we found that all groups present significantly enriched biological processes  
217 related to the innate, adaptive immune, and inflammatory responses of the host against the  
218 pathogen (among the top 30 most represented GO categories in these groups – Table S6). We also  
219 found significantly enriched categories of cellular response to interferon-beta and gamma, and  
220 defense response to virus, bacteria, and protozoa. This result highlights the intersection of  
221 intracellular pathogen defense mechanisms. However, the number of DEGs was not similar in each  
222 category. Col1.7G2-infected and mixture-infected groups displayed the highest number of DEGs  
223 in all upregulated biological processes (Figs 4A and 4C, respectively) and the JG-infected group  
224 presented the lowest number of DEGs in the upregulated categories (Fig 4B). Notably, both the  
225 mixture and Col1.7G2-infected groups presented enriched biological processes with statistical  
226 significance ( $-\log_{10}$  pvalue) that were higher than those encountered in the JG-infected group.  
227 This observation correlates with previous studies showing that JG leads to lower cytokine  
228 production and immune system activation during acute infection [25]. Every DEG encountered in  
229 each GO is available in the supplementary material (Table S7), as well as all non-DEGs from the  
230 background (Table S8).

231 Remarkably, the enriched biological processes observed in the mixture-infected group are  
232 consistent with those seen in the individual infected groups (Fig 4C). For instance, a high number

233 of upregulated genes were related to immune response (Col1.7G2 profile), and a high number of  
234 downregulated genes were related to translation, ATP synthesis and respiration (JG profile).  
235 Hence, the coexistence of both profiles in the mixture is substantial evidence of the presence of  
236 both *T. cruzi* strains in the mice during the acute phase of infection. Both JG- and the mixture-  
237 infected groups displayed categories of protein translation, ATP synthesis coupled respiratory  
238 electron chain and a significantly enriched tricarboxylic acid cycle.

239 To visualize the interactions between the enriched pathways and the genes within our list of DEGs,  
240 we constructed a functional network of each infected group compared to the control using the  
241 Cytoscape plugin, ClueGO. Here, we can appreciate the Col1.7G2 activated infection genes (Fig  
242 5A). Protein phosphorylation mediated by MAPKinase follows the transcription factor NfκB  
243 activation with subsequent immune-mediated pathway stimulation, such as cytokin production that  
244 leads to the establishment of a strong immune response [39]. Interestingly, JG infected samples  
245 exhibit less immune-mediated pathways when compared to Col1.7G2. However, it is evident that  
246 mitochondrial processes and electron transport chain genes are downregulated due to JG infection,  
247 particularly during the early phase (Fig 5B). It is worth noting that the Mixture-infected group  
248 displays a rich immunological network and also mitochondrial related gene downregulation,  
249 evidencing the concurrently presence of Col1.7G2 and JG-infected cells (Fig 5C).

250 To visualize the effect of JG and Mixture-infected downmodulation of genes that play specific  
251 roles within the mitochondria, we generated a heatmap from the KEGG database. The complete  
252 expression data of all genes and experimental groups are presented in the supplementary material  
253 (S2 and S3 Table). Notably, from the 13 protein-coding genes of the mitochondrial genome, 7

254 genes (Nd1, Nd2, Nd4, Nd5, Nd6, Co1 and Cytb) were downregulated in all experimental groups.  
255 In the JG- and Mixture-infected animals, they were almost four-fold downregulated and were  
256 approximately two-fold downregulated in the Col1.7G2-infected group (S3 Table). In addition,  
257 large and small ribosome subunits were significantly downregulated in the JG-infected but not in  
258 the Col1.7G2-infected group (Fig 6A). Interestingly, metabolic pathways, such as Oxidative  
259 phosphorylation (Fig 6B) and Citric acid cycle were strongly downregulated in JG and Mixture-  
260 infected animals when compared to Col1.7G2. As previously noted, these findings suggests that  
261 JG promotes a drastic reduction in oxidative metabolism and protein synthesis in the infected  
262 cardiac cells. Previous microarray studies showed the same oxidative phosphorylation  
263 downregulation pattern in cardiomyocytes infected by other *T. cruzi* strains [40, 41]. The  
264 downregulation of the electron transport chain and oxidative phosphorylation gene expression  
265 could either increase or decrease reactive oxygen species (ROS) levels, depending on the proton  
266 motive force, NADH/NAD<sup>+</sup> and CoQH<sub>2</sub>/CoQ ratios and O<sub>2</sub> concentration [42]. However,  
267 previous studies have shown that ROS is a double-edged sword for *T. cruzi* parasites, as it acts as  
268 a signaling molecule for *T. cruzi* replication in macrophages at low concentrations [43, 44], but it  
269 can be harmful at higher concentrations [45]. Interestingly, treatment with catalase reduces the  
270 multiplication of JG in cardiomyocytes, but not Col1.7G2, suggesting that H<sub>2</sub>O<sub>2</sub> acts as a signaling  
271 molecule for JG growth in these cells [36]. Notably, *T. cruzi* lacks the catalase gene, which may  
272 be important for the parasite to sense and overcome oxidative stress. Furthermore, *T. cruzi*  
273 parasites transfected with catalase showed increased resistance to H<sub>2</sub>O<sub>2</sub> and impaired signals for  
274 cell differentiation compared with wild-type parasites [46]. Excessive ROS level causes oxidative  
275 DNA damage, such as 8-oxo-7,8-dihydroguanine (OG) accumulation, which slows pathogen  
276 growth. Remarkably, Campos et al. have shown that JG and Esmeraldo (both *T. cruzi II*) are more

277 sensitive to oxidative DNA damage caused by H<sub>2</sub>O<sub>2</sub> treatment when compared to Col1.7G2 and  
278 Silvio (both *T. cruzi* I) [47]. They also showed that even before treatment with 200 μM H<sub>2</sub>O<sub>2</sub>, JG  
279 displayed more oxidative lesions in DNA than Col1.7G2, as determined by the amount of OG  
280 present in the nucleus. The role of OG in *T. cruzi* replication signaling is still poorly understood,  
281 but recent studies have shown that parasites overexpressing MutT, which are responsible for  
282 removing OG from DNA, increased intracellular parasite replication (CL Brener strain) in  
283 fibroblasts compared to WT [45]. Interestingly, the 8-oxo-dGMP MutT product may act as a stress  
284 signal carrier, and OG DNA lesions might act as an epigenetic modification, which serves as a  
285 sensor for oxidative stress, increasing gene expression [48]. Thus, the available evidence suggests  
286 that the differential multiplication rate between different *T. cruzi* strains caused by sensing and  
287 responding distinctively to ROS, may be crucial to determine the strain colonization in the heart  
288 of mice, and possibly other mammals such as humans.

289 Next, we sought to visualize DEGs involved in the immune response detected as enriched  
290 biological processes to capture differences between *T. cruzi* strains during the acute stage of  
291 infection. To visualize DEGs involved with CD we accessed KEGG pathway 05142 which  
292 evidenced a clear distinction between the JG- and Col1.7G2-infected animals (Fig 6C). As noticed  
293 earlier, we observed that the JG-infected group exhibited weaker activation of several immune  
294 response genes compared to Col1.7G2. For instance, in Col1.7G2-infected animals, *Tlr9* and *Tlr2*  
295 had a positive fold-change of approximately 5, relative to control animals, while the JG-infected  
296 group showed a positive fold-change of 2.7 (Fig 6C, Table S3). The high expression profile of  
297 cytokines such as *Ifn-γ*, *Il-6*, *Tnf* and *IL-12* observed in Col1.7 G2-infected animals corroborates  
298 the previously described Th1 host response induced by *T. cruzi* [24]. However, JG-infected

299 animals exhibit lower expression of these same genes. Similar to the CXC and CC chemokines  
300 involved in neutrophil and macrophage recruitment, transcriptional factors such as the Class II  
301 Major Histocompatibility Complex Transactivator (Ciita) and Tbx21/Tbet, a well-known Th1 cell-  
302 specific transcription factors, also displays lower expression levels in the JG group compared to  
303 the Col1.7G2 group (Fig 7C). Notably, animals inoculated with a mixture of both parasites  
304 generally exhibit the same pattern of immune response DEGs as the Col1.7G2-infected group.  
305 This expression pattern suggests that the Col1.7G2 strain is more likely to be detected early by the  
306 immune system and initiate a stronger immune response than the JG strain.

307 The evasion capability of each strain can further explain why there are differences in the expression  
308 of genes involved in the immune response when animals are infected with different parasite strains.  
309 From earlier studies, parasite-specific CD8+ T cells were not seen in the bloodstream of BALB/c  
310 mice until day 9 of infection by the Y strain (a nonvirulent *T. cruzi* II strain similar to JG). To  
311 prove whether this effect was due to immune evasion or immunosuppression, the authors  
312 administered agonists of *Tlr-2* and *Tlr-9* to emulate immune system recognition prior to infection.  
313 They showed that treated mice developed parasite-specific CD8+ T cells earlier than nontreated  
314 groups [49-51]. Therefore, the lower expression of immune response genes by JG-infected animals  
315 can be the result of an effective immune-system evasion of this strain, which could also be  
316 responsible for the persistence of this parasite in the heart of BALB/c mice in the chronic phase of  
317 the disease. One possible explanation for this evasion ability of *T. cruzi* is the transfer of sialic acid  
318 from host proteins to parasite surface proteins, such as mucins. Indeed, some of the most well-  
319 studied surface proteins of *T. cruzi*, namely, mucins, mucin-associated surface proteins (MASPs)  
320 and trans-sialidases (TSs) are strongly related to immune system evasion, cellular membrane

321 adhesion and cellular invasion [52-56]. Nevertheless, *T. cruzi* I strains have fewer genes coding  
322 for the mucin, MASP and TS families compared to *T. cruzi* II [57].

323 To confirm the expression data obtained from the RNA-Seq, we performed qPCR for validation  
324 (Fig 7). Quantitative PCR data shows that the fold change of most tested genes corroborates the  
325 reported RNA-Seq expression tendency. Highly upregulated genes in RNA-Seq analysis, such as  
326 Cxcl9 and Igtp, are also seen to be upregulated by qPCR when compared to the Gapdh, and genes  
327 coding for proteins acting in the mitochondria are seen to be downregulated by both methods. Data  
328 represents one sample from each group with three technical replicates.

329 In the present work, we depicted the differential ability of two *T. cruzi* strains (JG and Col1.7G2)  
330 to modulate gene expression in hearts of BALB/c mice at the acute phase of infection. We also  
331 showed how the mixture of these *T. cruzi* strains affects host gene expression. We described two  
332 major distinct behaviors: hearts of mice inoculated with JG or with the mixture of both strains  
333 exhibit many genes from oxidative metabolism and translation downregulated compared to the  
334 uninfected controls. However, hearts of mice inoculated with Col1.7G2 and with the mixture of  
335 both strains showed a strong activation of genes from the innate and adaptive immune response  
336 compared to noninfected hearts. Corroborating previous findings, we propose here that the  
337 remarkable differences between the two *T. cruzi* strains in their ability to persist in BALB/c hearts  
338 in the chronic stage of CD could be explained by differences in the higher intracellular proliferation  
339 rate of JG and its ability to slowly activate the immune response of the host at the acute phase of  
340 infection, in contrast to Col1.7G2, which strongly activates the host immune response and has a  
341 slower proliferation rate in cardiomyocytes. JG parasites would also benefit from the robust  
342 reduction of the overall energetic status of the cell and augmentation of ROS production to better  
343 establish in the tissue (Fig. 8). We suggest here that the different features of each *T. cruzi* strain,



344 such as ROS signaling, proliferation and immune system evasion, could determine the survival of  
345 one strain over others and prevail in host tissues. Altogether, our research highlights the need for  
346 a better understanding of the effect of *T. cruzi* polyparasitism, as well as the uniqueness of each *T.*  
347 *cruzi* strain and its interaction with the host.

## 348 **Materials and Methods**

### 349 **Ethics Statement**

350 All procedures complied with the standards stated in the Guide for the Care and Use of Laboratory  
351 Animals and were conducted under conditions approved by the local animal ethics committee [58].  
352 The Institutional Committee for Animal Ethics of UFMG (CEUA-UFMG, license 64/12) approved  
353 all experimental procedures used in this study. Both noninfected and infected animals were kept  
354 in plastic boxes with food and water *ad libitum* with the same appropriate conditions of technical  
355 management in cages that were properly identified and sealed in a 12-h light dark cycle  
356 environment. All animal procedures were performed under anesthesia using a mixture of ketamine  
357 (50 mg/kg) and xylazine (10 mg/kg).

358 *T. cruzi* populations used in this study, Col1.7G2 and JG, belong to lineages TCI and TCII,  
359 respectively. JG strain was originally isolated in 1995 by Professor Eliane Lages-Silva  
360 (Universidade Federal do Triângulo Mineiro, Brazil) from a chronic patient with megaesophagus.  
361 Col.1.7G2 strain is a clone from Colombian strain, which was originally isolated by Federici in  
362 1964 from a chronic patient with cardiac disorder [59]. Both JG and Col1.7G2 were formerly  
363 characterized as monoclonal population, through the analysis of the eight microsatellite loci  
364 according to previously described methodology [60]. Both strains belong to the *T. cruzi* collection  
365 from Laboratory of Chagas Disease (UFMG), coordinated by Professor Egler Chiari. Infective  
366 trypomastigote forms were thawed from liquid nitrogen preservation and parasites were injected  
367 into SWISS mice for population expansion and diluted to 50 parasites/100  $\mu$ l of sterile PBS for  
368 further use in BALB/c infections.

### 369 **Experimental Infection**

370 Inbred 6-8-week-old male BALB/c mice were obtained from the Centro de Bioterismo  
371 (CEBIO/ICB, Belo Horizonte, Brazil) and housed in our local animal facility under the same  
372 conditions. Mice were randomly divided into four groups of 5 individuals each. The noninfected  
373 controls were injected intraperitoneally (i.p.) with phosphate-buffered saline (PBS-vehicle), while  
374 the three experimental groups were injected (i.p.) with 50 trypomastigotes of the JG (*T. cruzi* II),  
375 50 of Col1.7G2 (*T. cruzi* I) and an artificial mixture of both strains (50 + 50 parasites). After  
376 infection, mice were caged according to group. Blood parasitemia was verified by counting the  
377 parasites present in 5  $\mu$ L of blood using an optical microscope at the 14<sup>th</sup> day post infection. On  
378 the 15<sup>th</sup> day, mice were anesthetized, and their hearts were collected, rapidly washed in sterile PBS  
379 and immediately frozen in liquid nitrogen.

#### 380 **RNA extraction, quality assessment, and sequencing**

381 Frozen hearts were kept in liquid nitrogen and thoroughly pulverized into a powder using a sterile  
382 porcelain crucible. The total RNA for sequencing was extracted using the Trizol reagent (Life  
383 Technologies) following the manufacturer's protocol and precipitated with isopropanol. The  
384 quality and integrity of the samples were verified by electrophoresis on a Bioanalyser 2100  
385 (Agilent Technologies), and only samples with an RNA integrity number (RIN) greater than seven  
386 were selected for library construction (S9 Table).

387 The cDNA libraries were prepared and sequenced at the Beijing Genomics Institute (Shenzhen,  
388 China). In short, polyadenylated RNA was purified from total RNA, converted to cDNA using  
389 random hexamer primers, sheared, and size-selected for fragments ~200 bp in length using the  
390 Illumina TruSeq RNA Sample Preparation Kit v2. Sequencing was performed on the Illumina  
391 HiSeq 2000 (Illumina, CA) platform and generated approximately 12 million paired-end reads,  
392 which were 90 nucleotides in length for each sample. Each group was sequenced in triplicate.

### 393 **Processing of raw sequencing reads**

394 Raw reads were first checked for quality using FastQC (Babraham Bioinformatics, Cambridge,  
395 UK) [61]. Since all samples displayed high-quality scores, no sequence trimming was performed.  
396 STAR aligner (v2.5) was used with default parameters to map read locations in the mm10  
397 (GRCM38) mouse reference genome [62]. Only uniquely mapping reads were retained for use in  
398 the downstream analysis (S1 Fig).

### 399 **Differential Expression, and graphic visualization**

400 Information on transcript abundances was obtained by raw read counts using HTseq-count [63],  
401 and differential expression analysis was performed using DESeq2 [64] in R version 3.2.4. For this  
402 study, we considered as differentially expressed genes presenting a 2-fold change in relation to the  
403 control group, with a false discovery rate (FDR) of 1%.

404 Principal component analysis (PCA) was performed using the regularized-logarithm  
405 transformation (rlog) offered by the DESeq2, and the heatmaps were constructed using the  
406 heatmap.2 function of gplots. A Venn diagram was created with an area-proportional web  
407 application [65].

408 All figures were mounted and treated using vector graphics quality within Adobe Illustrator 2017.

### 409 **Enrichment analysis**

410 We conducted the enrichment analysis using an R package with mouse genome-wide annotations  
411 [66]. Functional enrichment for biological processes (based on implemented Fisher's exact test)  
412 was calculated with the Bioconductor package topGO [67]. Of note, topGO makes a nonbiased  
413 background adjustment of data for enrichment analysis, since it considers as background only non-

414 DE genes with similar expression to DE genes as controls for comparison. We model the  
415 background by considering only genes expressed in the samples analyzed. In addition, we analyzed  
416 the upregulated and downregulated genes separately, as described previously [68].

### 417 **Functional network analysis**

418 The networks of enriched functional terms were constructed with the ClueGO plug-in using  
419 Cytoscape software [69, 70]. Our lists of DEGs was analyzed using the biological process EBI-  
420 QuickGO mouse annotation. Pathways with p-values less than 0.001 were considered statistically  
421 significant after Bonferroni step-down correction.

### 422 **Quantitative Real-Time PCR (qPCR)**

423 Total RNA of mouse hearts was extracted using TRIzol (Life Technologies, CA, US) and treated  
424 with TURBO™ DNase (Thermo Fisher Scientific, MA, US). cDNA was then produced with  
425 Superscript II kit first strand synthesis (Invitrogen, CA, US). PCR experiments were performed in  
426 a 7900HT Fast Real-Time PCR System (Applied Biosystems, CA, US) using the PowerUp SYBR  
427 Green Master Mix (Thermo Fisher Scientific, MA, US). Tested genes and primer sequences are  
428 provided in the Supplementary Table 10.

### 429 **Data availability**

430 All raw and processed sequencing data are available in the GEO (Gene Expression Omnibus)  
431 under the accession code: GSEXXXXXX.

### 432 **Acknowledgments**

433 The authors would like to thank the valuable contribution of Neuza Antunes Rodrigues and Afonso  
434 da Costa Viana who assisted us with mice procedures and parasite handling and Fabricio

435 Rodrigues dos Santos for making the use of the 7900HT Fast Real-Time PCR System available  
436 for qPCR analyses.

## 437 **Author Contributions**

438 **Conceptualization:** Castro TBR, Franco GR, Macedo AM, Canesso MCC, Pena SD  
439 **Data Curation:** Castro TBR, Chame DF, de Laet Souza D  
440 **Formal Analysis:** Castro TBR  
441 **Funding Acquisition:** Macedo AM, Franco GR, Chiari E, Machado CR, Pena SD, Castro TBR  
442 **Investigation:** Castro TBR, Chame DF, Laet Souza D  
443 **Methodology:** Castro TBR, Franco GR, Macedo AM, Toledo NE, Boroni M  
444 **Project Administration:** Franco GR, Macedo AM  
445 **Resources:** Chiari E, Macedo AM, Franco GR, Pena SD, Machado CR, Tahara EB  
446 **Supervision:** Franco GR, Macedo AM  
447 **Validation:** Castro TBR, Chame DF, de Laet Souza D  
448 **Visualization:** Castro TBR  
449 **Writing – Original Draft Preparation:** Castro TBR, Franco GR, Macedo AM, Canesso MCC,  
450 Boroni M, Toledo NE, Chame DF, Laet Souza D, Tahara EB, Pena SD

451

## 452 **Bibliographic Reference**

- 453 1. Organization WH. Chagas disease (American trypanosomiasis). Fact Sheet. 2017.
- 454 2. Coura J. The main sceneries of Chagas disease transmission. The vectors, blood and oral  
455 transmissions - A comprehensive review. Memórias do Instituto Oswaldo Cruz. 2015;110(3):277-82. doi:  
456 10.1590/0074-0276140362.
- 457 3. Coura J, Viñas P. Chagas disease: a new worldwide challenge. Nature. 2010;465(n7301\_supp). doi:  
458 10.1038/nature09221.
- 459 4. Meymandi SK, Forsyth CJ, Soverow J, Hernandez S, Sanchez D, Montgomery SP, et al. Prevalence  
460 of Chagas Disease in the Latin American–born Population of Los Angeles. Clinical Infectious Diseases.  
461 64(9). doi: 10.1093/cid/cix064.
- 462 5. Zingales B, Miles MA, Campbell DA, Tibayrenc M, Macedo AM, Teixeira M, et al. The revised  
463 Trypanosoma cruzi subspecific nomenclature: Rationale, epidemiological relevance and research  
464 applications. Infection, Genetics and Evolution. 2011;12(2):240-53. doi: 10.1016/j.meegid.2011.12.009.

- 465 6. Souto RP, Fernandes O, Macedo AM, Campbell DA, Zingales B. DNA markers define two major  
466 phylogenetic lineages of *Trypanosoma cruzi*. *Molecular and Biochemical Parasitology*. 1996;83(2):141-52.  
467 doi: 10.1016/S0166-6851(96)02755-7.
- 468 7. de Freitas JM, Augusto-Pinto L, Pimenta JR, Bastos-Rodrigues L, Gonçalves VF, Teixeira SM, et al.  
469 Ancestral genomes, sex, and the population structure of *Trypanosoma cruzi*. *PLoS pathogens*. 2006;2(3).  
470 doi: 10.1371/journal.ppat.0020024.
- 471 8. Burgos JM, Altchek J, Bisio M, Duffy T, Valadares HM, Seidenstein MEE, et al. Direct molecular  
472 profiling of minicircle signatures and lineages of *Trypanosoma cruzi* bloodstream populations causing  
473 congenital Chagas disease. *International journal for parasitology*. 2007;37(12):1319-27. doi:  
474 10.1016/j.ijpara.2007.04.015.
- 475 9. Marcili A, Lima L, Cavazzana M, Junqueira AC, Veludo HH, Maia Da Silva F, et al. A new genotype  
476 of *Trypanosoma cruzi* associated with bats evidenced by phylogenetic analyses using SSU rDNA,  
477 cytochrome b and Histone H2B genes and genotyping based on ITS1 rDNA. *Parasitology*. 2009;136(6):641-  
478 55. doi: 10.1017/S0031182009005861.
- 479 10. Vago AR, Macedo AM, Oliveira RP, Andrade LO, Chiari E, Galvão LM, et al. Kinetoplast DNA  
480 signatures of *Trypanosoma cruzi* strains obtained directly from infected tissues. *The American journal of*  
481 *pathology*. 1996;149(6):2153-9.
- 482 11. Vago AR, Andrade LO, Leite AA, d'Avila Reis D, Macedo AM, Adad SJ, et al. Genetic characterization  
483 of *Trypanosoma cruzi* directly from tissues of patients with chronic Chagas disease: differential  
484 distribution of genetic types into diverse organs. *The American journal of pathology*. 2000;156(5):1805-9.
- 485 12. Andrade LO, Machado CR, Chiari E, Pena SD, Macedo AM. Differential tissue distribution of diverse  
486 clones of *Trypanosoma cruzi* in infected mice. *Molecular and biochemical parasitology*. 1999;100(2):163-  
487 72. doi: 10.1016/S0166-6851(99)90035-X.
- 488 13. Andrade LO, Machado C, Chiari E, Pena S, Macedo AM. *Trypanosoma cruzi*: role of host genetic  
489 background in the differential tissue distribution of parasite clonal populations. *Experimental*  
490 *Parasitology*. 2002;100(4):269-75. doi: 10.1016/S0014-4894(02)00024-3.
- 491 14. Husson R. [--Taxy, --tactism and --tropism]. *Bulletin of the World Health Organization*.  
492 1968;38(5):799-802.
- 493 15. Gussin AE. JACQUES LOEB: THE MAN AND HIS TROPISM THEORY OF ANIMAL CONDUCT. *Journal*  
494 *of the history of medicine and allied sciences*. 1963;18:321-36.

- 495 16. McFadden G, Mohamed MR, Rahman MM, Bartee E. Cytokine determinants of viral tropism.  
496 Nature Reviews Immunology. 2009;9(9):645-55. doi: 10.1038/nri2623.
- 497 17. McCall L-I, Siqueira-Neto JL, McKerrow JH. Location, Location, Location: Five Facts about Tissue  
498 Tropism and Pathogenesis. PLOS Pathogens. 2016;12(5). doi: 10.1371/journal.ppat.1005519.
- 499 18. Macedo AM, Pena SD. Genetic Variability of *Trypanosoma cruzi*: Implications for the Pathogenesis  
500 of Chagas Disease. Parasitology today (Personal ed). 1998;14(3):119-24. doi: 10.1016/S0169-  
501 4758(97)01179-4.
- 502 19. Holscher C, Mohrs M, Dai WJ, Kohler G, Ryffel B, Schaub GA, et al. Tumor Necrosis Factor Alpha-  
503 Mediated Toxic Shock in *Trypanosoma cruzi*-Infected Interleukin 10-Deficient Mice. Infection and  
504 Immunity. 2000;68(7):4075-83. doi: 10.1128/IAI.68.7.4075-4083.2000.
- 505 20. Takeuchi O, Akira S. Pattern recognition receptors and inflammation. Cell. 2010;140(6):805-20.  
506 doi: 10.1016/j.cell.2010.01.022.
- 507 21. Bartholomeu DC, Ropert C, Melo MB, Parroche P, Junqueira CF, Teixeira SMR, et al. Recruitment  
508 and endo-lysosomal activation of TLR9 in dendritic cells infected with *Trypanosoma cruzi*. Journal of  
509 immunology (Baltimore, Md : 1950). 2008;181(2):1333-44. doi: 10.4049/jimmunol.181.2.1333.
- 510 22. Bafica A, Santiago HC, Goldszmid R, Ropert C, Gazzinelli RT, Sher A. Cutting edge: TLR9 and TLR2  
511 signaling together account for MyD88-dependent control of parasitemia in *Trypanosoma cruzi* infection.  
512 J Immunol. 2006;177(6):3515-9. doi: 10.4049/jimmunol.177.6.3515.
- 513 23. Gravina HD, Antonelli L, Gazzinelli RT, Ropert C. Differential Use of TLR2 and TLR9 in the Regulation  
514 of Immune Responses during the Infection with *Trypanosoma cruzi*. PLoS ONE. 2013;8(5). doi:  
515 10.1371/journal.pone.0063100.
- 516 24. Aliberti JC, Cardoso MA, Martins GA, Gazzinelli RT, Vieira LQ, Silva JS. Interleukin-12 mediates  
517 resistance to *Trypanosoma cruzi* in mice and is produced by murine macrophages in response to live  
518 trypomastigotes. Infection and immunity. 1996;64(6):1961-7.
- 519 25. Rodrigues C, Valadares H, Francisco A, Arantes J, Campos C, Teixeira-Carvalho A, et al. Coinfection  
520 with Different *Trypanosoma cruzi* Strains Interferes with the Host Immune Response to Infection. PLoS  
521 Neglected Tropical Diseases. 2010;4(10). doi: 10.1371/journal.pntd.0000846.
- 522 26. Franco DJ, Vago AR, Chiari E, Meira F, Galvão L, Machado C. *Trypanosoma cruzi*: mixture of two  
523 populations can modify virulence and tissue tropism in rat. Experimental Parasitology. 2003;104(1-2):54-  
524 61. doi: 10.1016/S0014-4894(03)00119-X.



- 525 27. Andrade LO, Galvao LM, Meirelles Mde N, Chiari E, Pena SD, Macedo AM. Differential tissue  
526 tropism of *Trypanosoma cruzi* strains: an in vitro study. *Mem Inst Oswaldo Cruz*. 2010;105(6):834-7.  
527 PubMed PMID: 20945002.
- 528 28. Sales-Campos H, Kappel H, Andrade C, Lima T, de Castilho A, Giraldo L, et al. *Trypanosoma cruzi*  
529 DTU TcII presents higher blood parasitism than DTU TcI in an experimental model of mixed infection. *Acta*  
530 *Parasitologica*. 2015;60(3):435-41. doi: 10.1515/ap-2015-0060.
- 531 29. Davenport MP, Belz GT, Ribeiro RM. The race between infection and immunity: how do pathogens  
532 set the pace? *Trends in Immunology*. 2009;30(2):61-6. doi: 10.1016/j.it.2008.11.001.
- 533 30. Macedo AM, Pena SDJ. Genetic Variability of *Trypanosoma cruzi*: Implications for the Pathogenesis  
534 of Chagas Disease. *Parasitology Today*. 1998;14(3):119-24. doi: 10.1016/S0169-4758(97)01179-4.
- 535 31. Combs TP, Mukherjee S, Almeida CJG, Jelicks LA, Schubert W, Lin Y, et al. The adipocyte as an  
536 important target cell for *Trypanosoma cruzi* infection. *Journal of Biological Chemistry*.  
537 2005;280(25):24085-94. doi: 10.1074/jbc.M412802200.
- 538 32. Brener Z. Biology of *Trypanosoma Cruzi*. *Annual Review of Microbiology*. 1973;27(1):347-82. doi:  
539 10.1146/annurev.mi.27.100173.002023.
- 540 33. Perez CJ, Lymbery AJ, Thompson RC. Chagas disease: the challenge of polyparasitism? *Trends in*  
541 *Parasitology*. 2014;30(4):176-82. doi: 10.1016/j.pt.2014.01.008.
- 542 34. Caradonna KL, Engel JC, Jacobi D, Lee C-H, Burleigh BA. Host Metabolism Regulates Intracellular  
543 Growth of *Trypanosoma cruzi*. *Cell Host & Microbe*. 2013;13(1):108-17. doi: 10.1016/j.chom.2012.11.011.
- 544 35. Richardson RB, Allan DS, Le Y. Greater organ involution in highly proliferative tissues associated  
545 with the early onset and acceleration of ageing in humans. *Experimental gerontology*. 2014;55:80-91. doi:  
546 10.1016/j.exger.2014.03.015.
- 547 36. Dias PP, Capila RF, do Couto NF, Estrada D, Gadelha FR, Radi R, et al. Cardiomyocyte oxidants  
548 production may signal to *T. cruzi* intracellular development. *PLoS Negl Trop Dis*. 2017;11(8):e0005852.  
549 doi: 10.1371/journal.pntd.0005852. PubMed PMID: 28832582.
- 550 37. Perez CJ, Thompson RC, Keatley SK, Walsh AL, Lymbery AJ. The effect of reinfection and mixed  
551 *Trypanosoma cruzi* infections on disease progression in mice. *Acta Tropica*. 2018;178:107-14. doi:  
552 10.1016/j.actatropica.2017.11.002.

- 553 38. Magalhães LMM, Viana A, Chiari E, Galvão LMM, Gollob KJ, Dutra WO. Differential Activation of  
554 Human Monocytes and Lymphocytes by Distinct Strains of *Trypanosoma cruzi*. PLoS neglected tropical  
555 diseases. 2015;9(7). doi: 10.1371/journal.pntd.0003816.
- 556 39. Soares-Silva M, Diniz FF, Gomes GN, Bahia D. The Mitogen-Activated Protein Kinase (MAPK)  
557 Pathway: Role in Immune Evasion by *Trypanosomatids*. 2016;7(183). doi: 10.3389/fmicb.2016.00183.
- 558 40. Garg N, Popov VL, Papaconstantinou J. Profiling gene transcription reveals a deficiency of  
559 mitochondrial oxidative phosphorylation in *Trypanosoma cruzi*-infected murine hearts: implications in  
560 chagasic myocarditis development. *Biochimica et biophysica acta*. 2003;1638(2):106-20.
- 561 41. Manque PA, Probst CM, Probst C, Pereira MCS, Rampazzo RCP, Ozaki L, et al. *Trypanosoma cruzi*  
562 Infection Induces a Global Host Cell Response in Cardiomyocytes. *Infection and Immunity*.  
563 2011;79(5):1855-62. doi: 10.1128/IAI.00643-10.
- 564 42. Murphy MP. How mitochondria produce reactive oxygen species. *The Biochemical journal*.  
565 2009;417(1):1-13. doi: 10.1042/bj20081386.
- 566 43. Paiva CN, Feijó DF, Dutra FF, Carneiro VC, Freitas GB, Alves LS, et al. Oxidative stress fuels  
567 *Trypanosoma cruzi* infection in mice. *Journal of Clinical Investigation*. 2012;122(7):2531-42. doi:  
568 10.1172/JCI58525.
- 569 44. Goes GR, Rocha PS, Diniz ARS, Aguiar PHN, Machado CR, Vieira LQ. *Trypanosoma cruzi* Needs a  
570 Signal Provided by Reactive Oxygen Species to Infect Macrophages. *PLOS Neglected Tropical Diseases*.  
571 2016;10(4). doi: 10.1371/journal.pntd.0004555.
- 572 45. Aguiar PHN, Furtado C, Repolês BM, Ribeiro GA, Mendes IC, Peloso EF, et al. Oxidative Stress and  
573 DNA Lesions: The Role of 8-Oxoguanine Lesions in *Trypanosoma cruzi* Cell Viability. *PLoS Neglected*  
574 *Tropical Diseases*. 2013;7(6). doi: 10.1371/journal.pntd.0002279.
- 575 46. Freire ACG, Alves CL, Goes GR, Resende BC, Moretti NS, Nunes VS, et al. Catalase expression  
576 impairs oxidative stress-mediated signalling in *Trypanosoma cruzi*. *Parasitology*. 2017:1-13. doi:  
577 10.1017/S0031182017001044. PubMed PMID: 28653592.
- 578 47. Campos PC, Silva VG, Furtado C, Machado-Silva A, DaRocha WD, Peloso EF, et al. *Trypanosoma*  
579 *cruzi* MSH2: Functional analyses on different parasite strains provide evidences for a role on the oxidative  
580 stress response. *Molecular and Biochemical Parasitology*. 2011;176(1):8-16. doi:  
581 10.1016/j.molbiopara.2010.11.001.

- 582 48. Fleming AM, Ding Y, Burrows CJ. Oxidative DNA damage is epigenetic by regulating gene  
583 transcription via base excision repair. *Proceedings of the National Academy of Sciences*.  
584 2017;114(10):2604-9. doi: 10.1073/pnas.1619809114.
- 585 49. Padilla AM, Simpson LJ, Tarleton RL. Insufficient TLR activation contributes to the slow  
586 development of CD8+ T cell responses in *Trypanosoma cruzi* infection. *Journal of immunology (Baltimore,*  
587 *Md : 1950)*. 2009;183(2):1245-52. doi: 10.4049/jimmunol.0901178.
- 588 50. Tarleton RL. Immune system recognition of *Trypanosoma cruzi*. *Current Opinion in Immunology*.  
589 2007;19(4):430-4. doi: 10.1016/j.coi.2007.06.003.
- 590 51. Padilla AM, Bustamante JM, Tarleton RL. CD8+ T cells in *Trypanosoma cruzi* infection. *Current*  
591 *Opinion in Immunology*. 2009;21(4):385-90. doi: 10.1016/j.coi.2009.07.006.
- 592 52. El-Sayed NM, Myler PJ, Bartholomeu DC, Nilsson D, Aggarwal G, Tran A-N, et al. The genome  
593 sequence of *Trypanosoma cruzi*, etiologic agent of Chagas disease. *Science*. 2005;309(5733):409-15. doi:  
594 10.1126/science.1112631.
- 595 53. Bartholomeu DC, Cerqueira GC, Leao ACA. Genomic organization and expression profile of the  
596 mucin-associated surface protein (masp) family of the human pathogen *Trypanosoma cruzi*. *Nucleic acids*  
597 *....* 2009. doi: 10.1093/nar/gkp172.
- 598 54. Ruiz Díaz P, Mucci J, Meira MAA, Bogliotti Y, Musikant D, Leguizamón MSS, et al. *Trypanosoma*  
599 *cruzi* trans-sialidase prevents elicitation of Th1 cell response via interleukin 10 and downregulates Th1  
600 effector cells. *Infection and immunity*. 2015;83(5):2099-108. doi: 10.1128/IAI.00031-15.
- 601 55. Yoshida N, Dorta ML, Ferreira AT, Oshiro ME, Mortara RA, Acosta-Serrano A, et al. Removal of  
602 sialic acid from mucin-like surface molecules of *Trypanosoma cruzi* metacyclic trypomastigotes enhances  
603 parasite-host cell interaction. *Mol Biochem Parasitol*. 1997;84(1):57-67. PubMed PMID: 9041521.
- 604 56. Nardy A, Freire-de-Lima C, Morrot A. Immune Evasion Strategies of *Trypanosoma cruzi*. *Journal of*  
605 *Immunology Research*. 2015;2015:1-7. doi: 10.1155/2015/178947.
- 606 57. Pablos L, Osuna A. Multigene Families in *Trypanosoma cruzi* and Their Role in Infectivity. *Infection*  
607 *and Immunity*. 2012;80(7):2258-64. doi: 10.1128/IAI.06225-11.
- 608 58. The Guide for the Care and Use of Laboratory Animals. *ILAR journal*. 2016;57(2). doi:  
609 10.1093/ilar/ilw049.

- 610 59. Federici EE, Abelmann WH, Neva FA. CHRONIC AND PROGRESSIVE MYOCARDITIS AND MYOSITIS  
611 IN C3H MICE INFECTED WITH TRYPANOSOMA CRUZI. *The American journal of tropical medicine and*  
612 *hygiene*. 1964;13:272-80.
- 613 60. Oliveira RP, Broude NE, Macedo AM, Cantor CR, Smith CL, Pena SDJ. Probing the genetic  
614 population structure of *Trypanosoma cruzi* with polymorphic microsatellites. *Proceedings of the National*  
615 *Academy of Sciences*. 1998;95(7):3776-80. doi: 10.1073/pnas.95.7.3776.
- 616 61. Andrews S. FastQC: a quality control tool for high throughput sequence data. 2010.
- 617 62. Dobin A, Davis CA, Schlesinger F, Drenkow J, Zaleski C, Jha S, et al. STAR: ultrafast universal RNA-  
618 seq aligner. *Bioinformatics*. 2013;29(1):15-21. doi: 10.1093/bioinformatics/bts635.
- 619 63. Anders S, Pyl P, Huber W. HTSeq—a Python framework to work with high-throughput sequencing  
620 data. *Bioinformatics*. 2015;31(2):166-9. doi: 10.1093/bioinformatics/btu638.
- 621 64. Love MI, Huber W, Anders S. Moderated estimation of fold change and dispersion for RNA-seq  
622 data with DESeq2. *Genome Biology*. 2014;15(12):550. doi: 10.1186/s13059-014-0550-8.
- 623 65. Hulsen T, de Vlieg J, Alkema W. BioVenn - a web application for the comparison and visualization  
624 of biological lists using area-proportional Venn diagrams. *BMC Genomics*. 2008;9:488. doi: 10.1186/1471-  
625 2164-9-488. PubMed PMID: 18925949; PubMed Central PMCID: PMC2584113.
- 626 66. Carlson M. org.Mm.eg.db: Genome wide annotation for Mouse. 2017.
- 627 67. J AAaR. topGO: Enrichment Analysis for Gene Ontology. R package version 2240. 2016.
- 628 68. Hong G, Zhang W, Li H, Shen X, Guo Z. Separate enrichment analysis of pathways for up- and  
629 downregulated genes. *Journal of The Royal Society Interface*. 2013;11(92):20130950-. doi:  
630 10.1098/rsif.2013.0950.
- 631 69. Bindea G, Mlecnik B, Hackl H, Charoentong P, Tosolini M, Kirilovsky A, et al. ClueGO: a Cytoscape  
632 plug-in to decipher functionally grouped gene ontology and pathway annotation networks. *Bioinformatics*  
633 (Oxford, England). 2009;25(8):1091-3. doi: 10.1093/bioinformatics/btp101.
- 634 70. Shannon P, Markiel A, Ozier O, Baliga NS, Wang JT, Ramage D, et al. Cytoscape: a software  
635 environment for integrated models of biomolecular interaction networks. *Genome research*.  
636 2003;13(11):2498-504. doi: 10.1101/gr.1239303.

637

## 638 **Figure legends**

639 **Figure 1. Differences between two *T. cruzi* strains.** (A) Survival curve of mice with *T. cruzi*  
640 infection for 60 days. (B) Mouse parasitemia 14 days after infection. Data represents mean  $\pm$  SEM,  
641  $n=5$  mice/group \*  $p<0.05$  comparing Col1.7G2 group to JG and mixture.

642 **Figure 2. Experimental Design.** (A) BALB/c mice were divided into one control and three  
643 experimental groups, infected with Col1.7G2, JG, or mixed strains of equivalent quantities of both  
644 strains. After 15 days, during the acute phase, mice were euthanized, and hearts were removed for  
645 total RNA extraction and sequencing with Illumina HiSeq2000. (B) To capture overall expression  
646 profile of each infected mouse sample, controls (blank dots), Col1.7G2-infected (green dots), JG-  
647 infected (yellow dots) and Mixture-infected (blue dots), were compared using principal component  
648 analysis (PCA). The first two principal components (PC1 and PC2) are plotted according to rlog-  
649 transformed data of read counts for each gene. (C) Hierarchical clustering of rlog-transformed data  
650 matrix exhibited as heatmap of Euclidian distances between samples.

651 **Figure 3. Comparative analysis of mouse gene expression after exposure to single and mixed**  
652 ***T. cruzi* infections.** Volcano plot of (A) Col1.7G2-, (B) JG- and (C) mixture-infected groups  
653 showing  $\log_2$  of fold changes of each detected gene on the x-axis, along with  $-\log_{10}$  of adjusted  
654 p-values (FDR) after comparison with noninfected controls. Differentially expressed gene are in  
655 blue ( $\log_2\text{fold-change} < -1$ ) for downregulated genes and red ( $\log_2\text{fold-change} > +1$ ) for  
656 upregulated genes. Grey dots represent genes that were not considered differentially expressed.  
657 Genes with  $-\log_{10}$  FDR equal or smaller than 50 are shown as diamond shapes. (D) The scaled  
658 Venn diagram shows the proportion of shared and exclusive genes in each group. Up- and

659 downregulated genes are shown in red and blue, respectively. (E) Distribution of FDRs of  
660 exclusive genes from mixture in the Col1.7G2-infected (MiC) or JG-infected (MiJ) groups and  
661 exclusive genes from Col1.7G2 in JG-infected group (CiJ) or vice versa (JiC) dataset are shown.

662 **Figure 4. Analysis of enriched Gene Ontology categories present in differentially expressed**  
663 **genes.** All genes from (A) Col1.7G2, (B) JG and (C) mixture groups were analyzed in accordance  
664 with their Gene Ontology terms using the topGO package for R. Encountered GO terms derived  
665 from up and downregulated genes are shown in red and blue, respectively. Bars represent  $-\log_{10}$   
666 of Fisher elim p-value ( $p < 0.01$ ). Histogram values represent the number of differentially  
667 expressed genes by the number of expressed genes in the background.

668 **Figure 5. Functional networks of enriched biological processes.** Network of biological  
669 processes of (A) Col1.7G2- (B) JG- and (C) Mixture-infected groups. Functional groups with more  
670 than 90% of upregulated or downregulated genes are shown in red or blue, respectively. Data  
671 represents only gene clusters with p-values less than 0.001 after Bonferroni step-down correction.

672 **Figure 6. Heatmap of DEGs** included in (A) Ribosomes subunits, (B) Oxidative phosphorylation  
673 pathway, (C) Chagas disease related genes and (D) Chemokine signaling. Data represent z-score  
674 of normalized read counts ( $\log_2$  scale) for each gene. Base mean track shows average gene  
675 expression between samples.

676 **Figure 7. Quantitative real-time RT-PCR validation of differentially expressed genes.**  
677 Expression levels of tested genes were normalized to Gapdh (housekeeping gene) and fold-change  
678 values were calculated with the  $2^{-\Delta\Delta CT}$  method. All PCR reactions were performed with three  
679 technical replicates.

680 **Figure 8. Proposed model for preferential prevalence of JG over Col1.7G2 in BALB/c mouse**  
681 **hearts.** Throughout the acute stage of *T. cruzi* infection, Col1.7G2 parasites induce a strong Th1-  
682 polarized immune response in mouse hearts. Although a potent Th1 response helps developing  
683 against parasites, amastigote nests are capable to survive later at chronic stages. Mice infected with  
684 the JG strain exhibit lower Th1 response and higher survival rates compared to Col1.7G2. In  
685 parallel, JG parasites, stimulated by higher sensitivity to ROS generated by mitochondrial  
686 metabolism down-modulation, display rapid increase in clonal burden. During a mixed infection  
687 with both strains, JG parasites can overcome Col1.7G2 population due to an enhanced  
688 proliferation.

## 689 **Supporting information**

690 **S1 Table. Total number of reads and mapping statistics.** Number of sequences from each  
691 sample and proportion of reads mapping at single positions using GRCm38 mouse genome.

692 **S2 Table. Dataset of all detected genes.** Full dataset of gene expression analysis after comparing  
693 experimental groups with controls, including Ensembl gene ID, external gene name, gene biotype,  
694 chromosome coordinates, expression mean, fold change statistics and adjusted p-values (FDR).

695 **S3 Table. Filtered dataset from genes considered differentially expressed.** Complete list of  
696 differentially expressed genes (DEG) from all experimental groups after filtering the full dataset  
697 of detected genes following a 2-fold change and 1% FDR.

698 **S4 Table. Gene biotype statistics.** Statistics of all differentially expressed genes with their biotype  
699 classification.

700 **S5 Table. Venn diagram dataset.** List of all shared genes in each experimental group and their  
701 expression levels which were used to generate the Venn diagram.

702 **S6 Table. Complete Gene Ontology analysis dataset.** Table with a complete list of terms  
703 containing up- or downregulated genes. Each functional category is shown with the number of  
704 detected (annotated) and differentially expressed (significant) genes.

705 **S7 Table. Differentially expressed genes per GO category.** Table with a complete list of all  
706 DEGs encountered in each enriched GO category.

707 **S8 Table. Genes per GO category.** Table with a complete list of all expressed gene encountered  
708 in dataset per enriched GO category.

709 **S9 Table. Sample description and RNA quality statistics.** RNA quality attributes of samples  
710 used in library construction.

711 **S1 Fig. Overall workflow.** All major bioinformatics steps performed in this work.



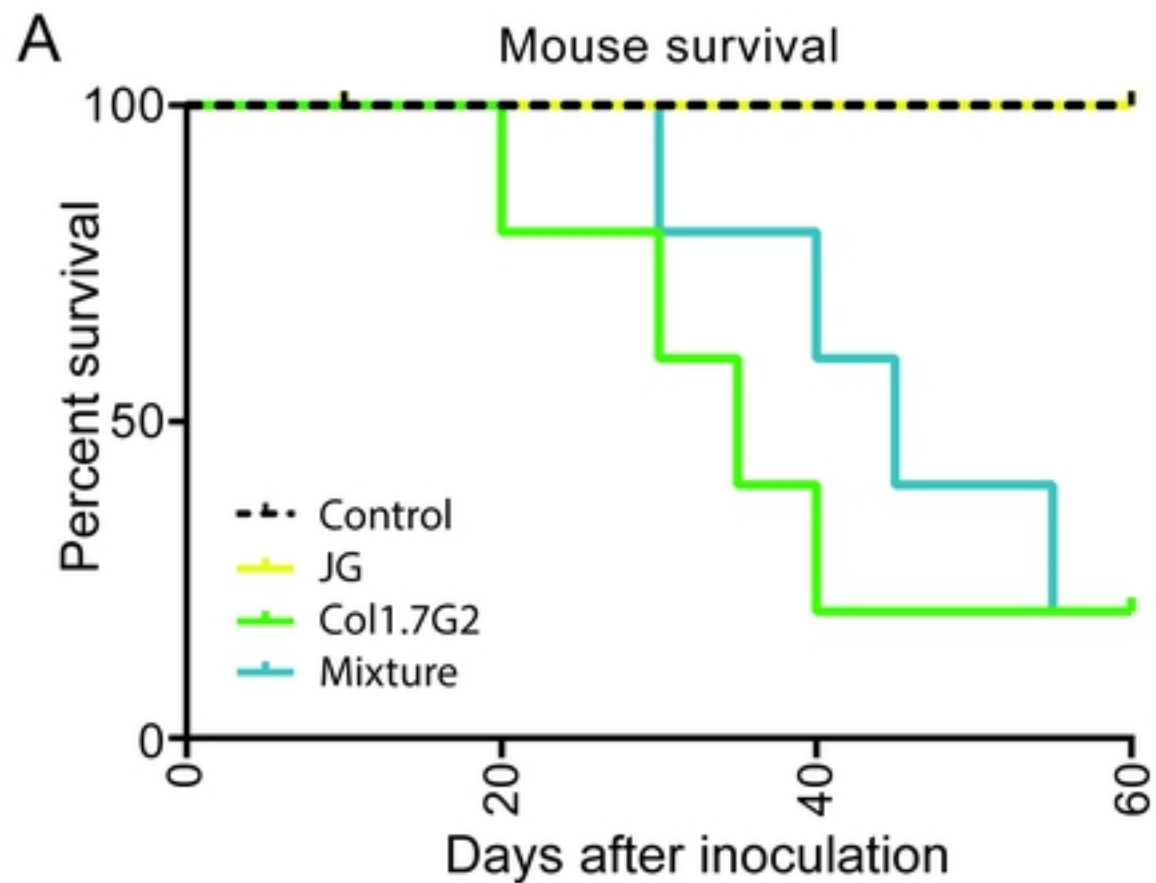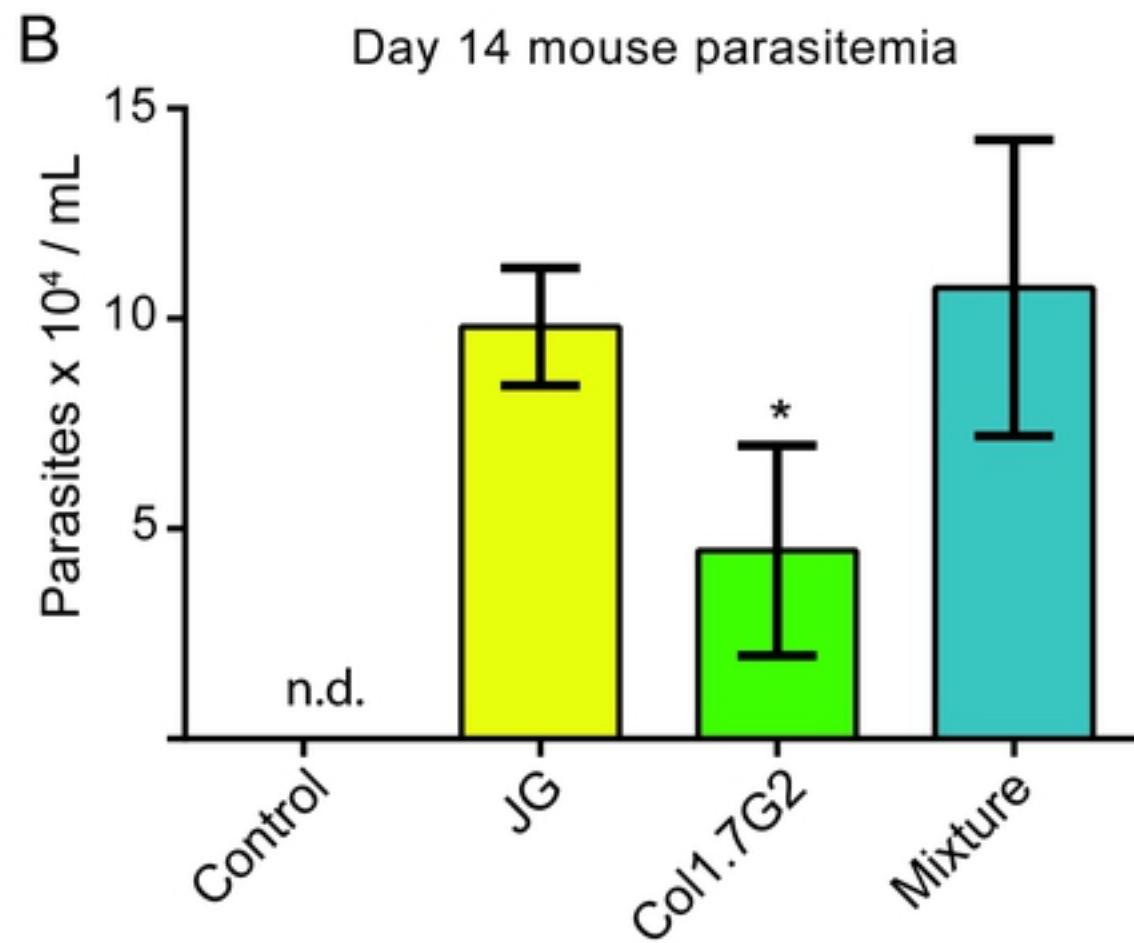

Figure 1

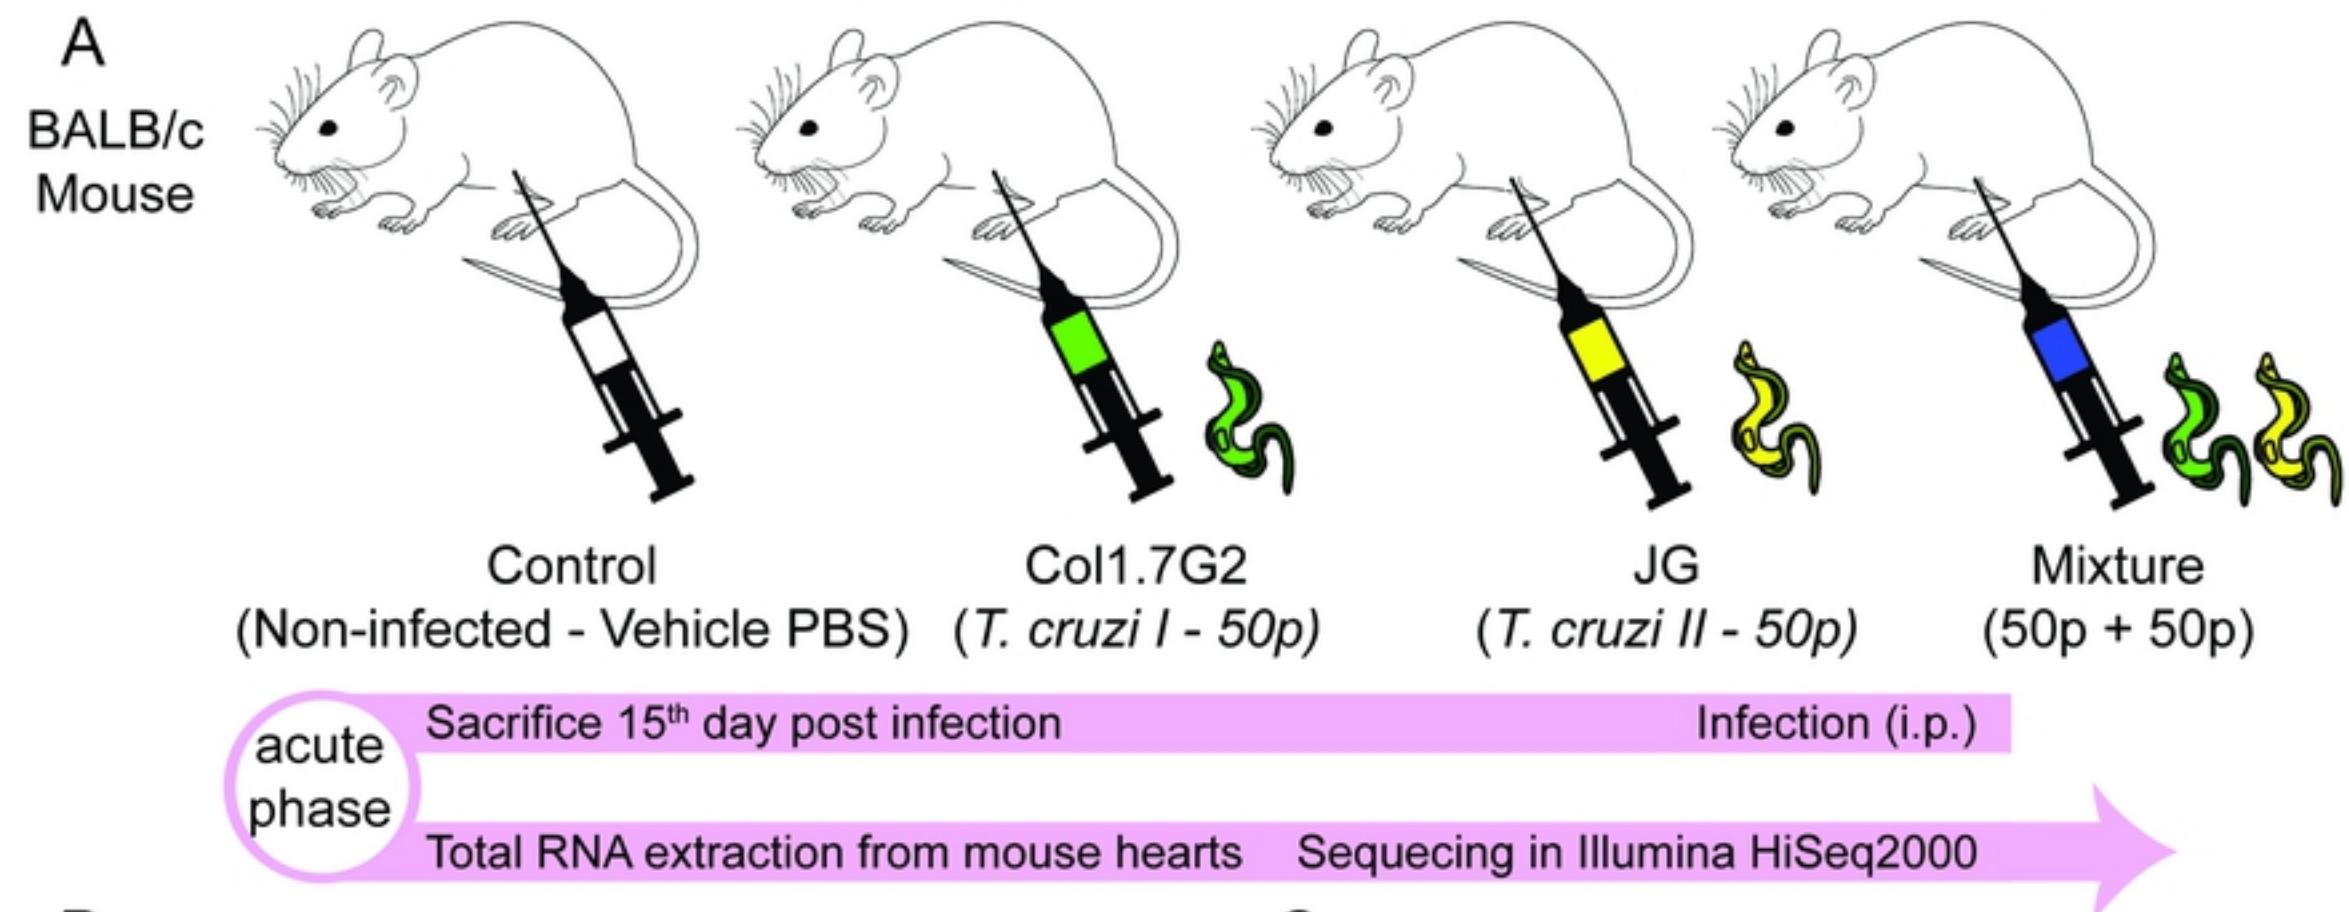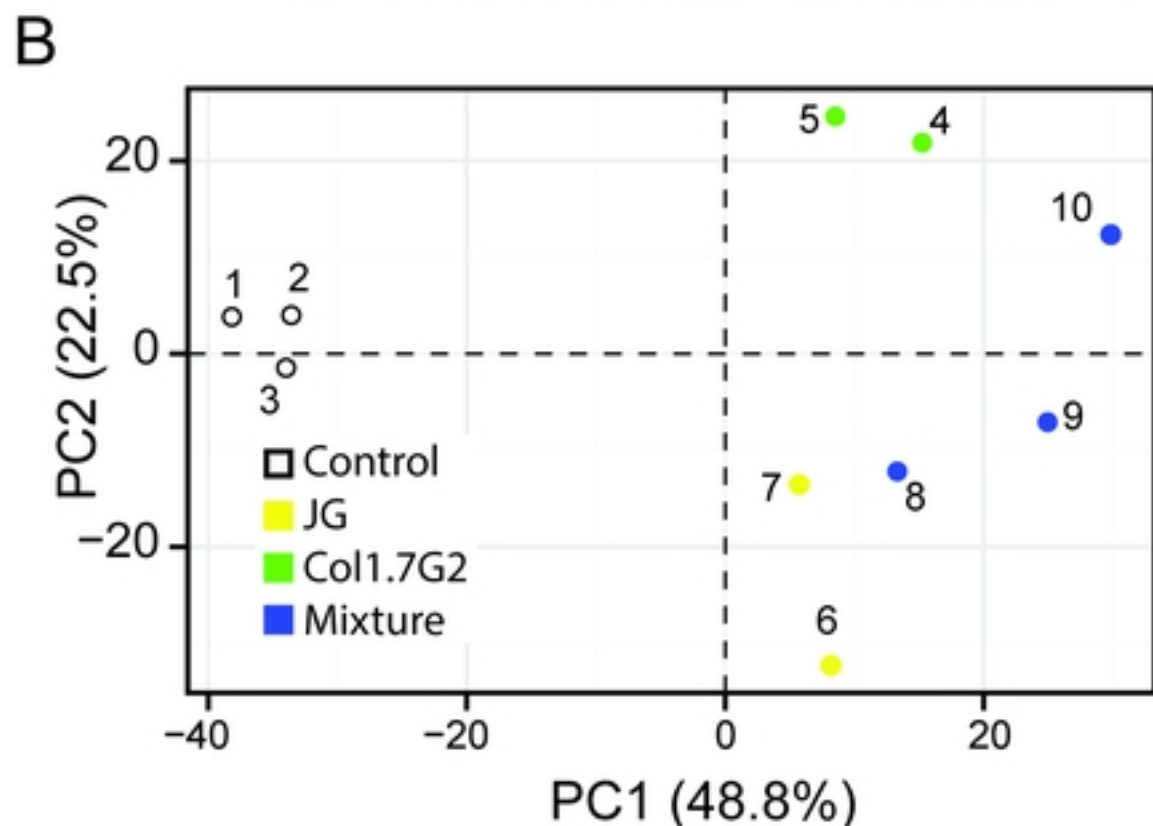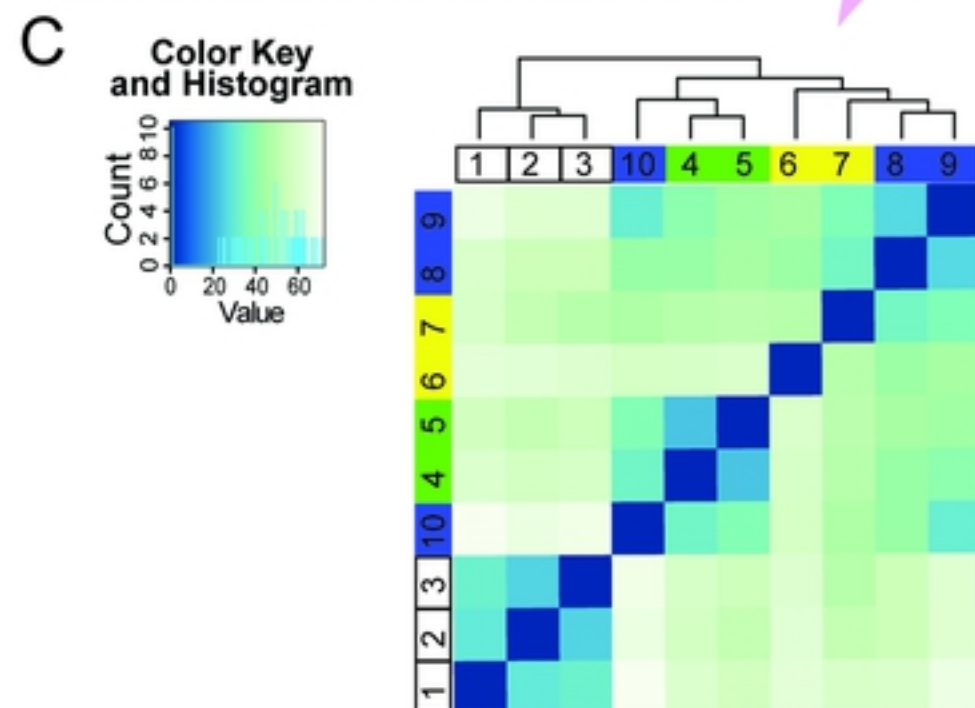

Figure 2

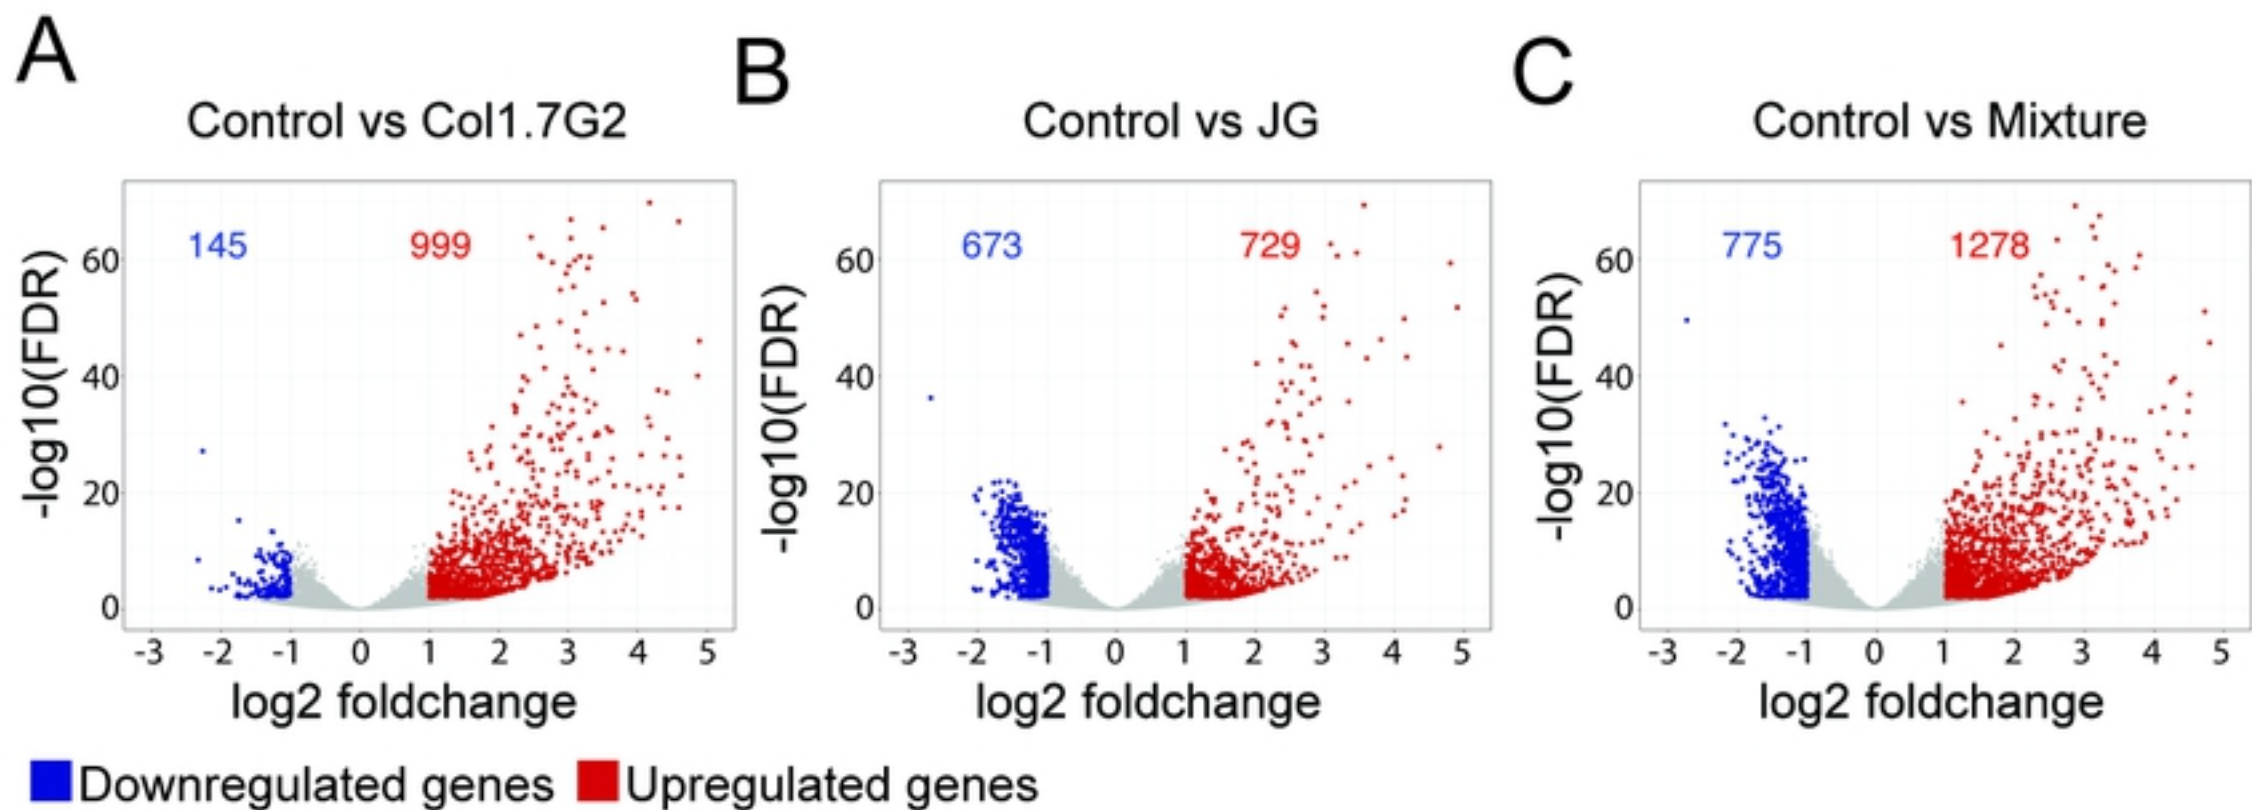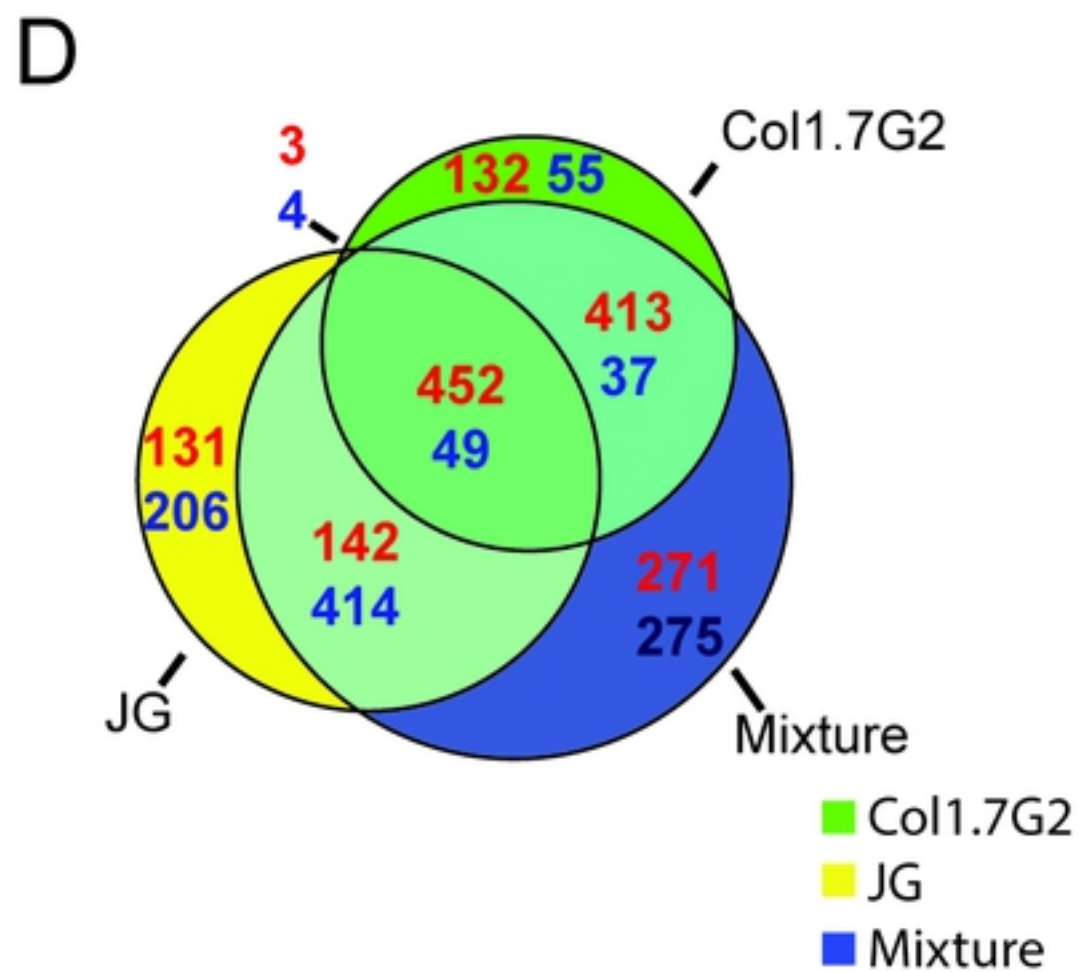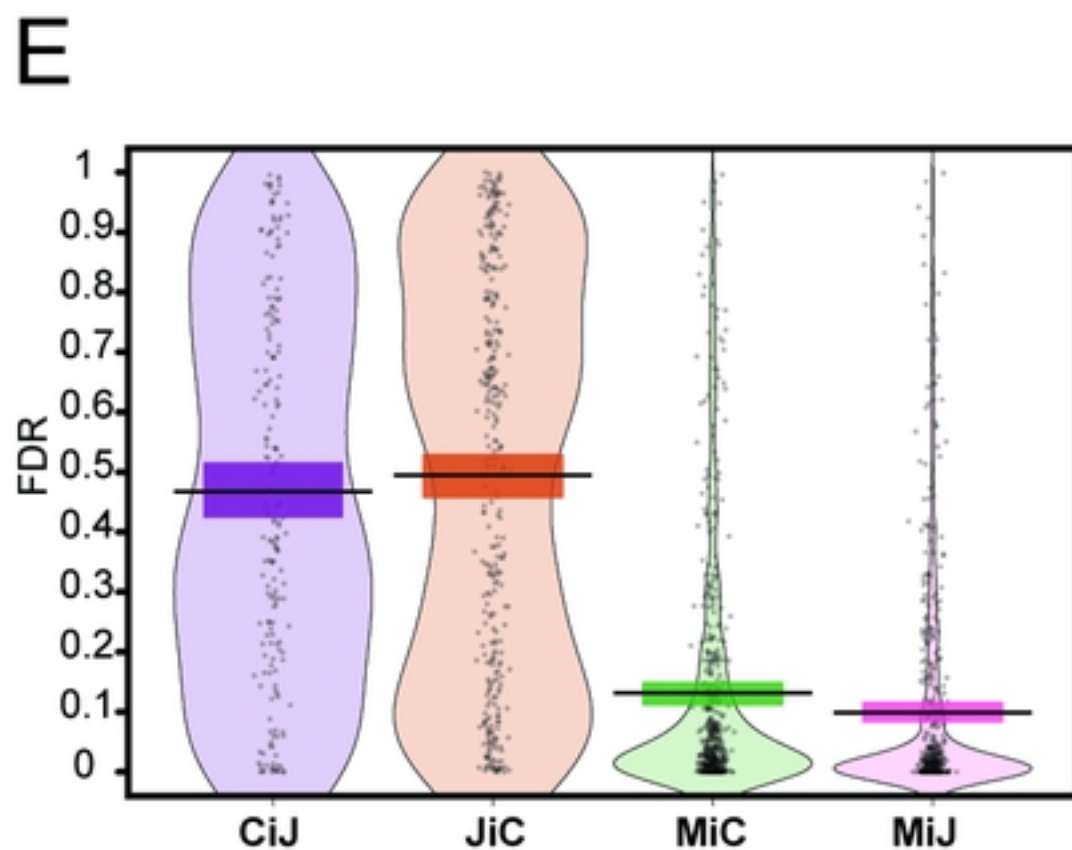

Figure 3

A

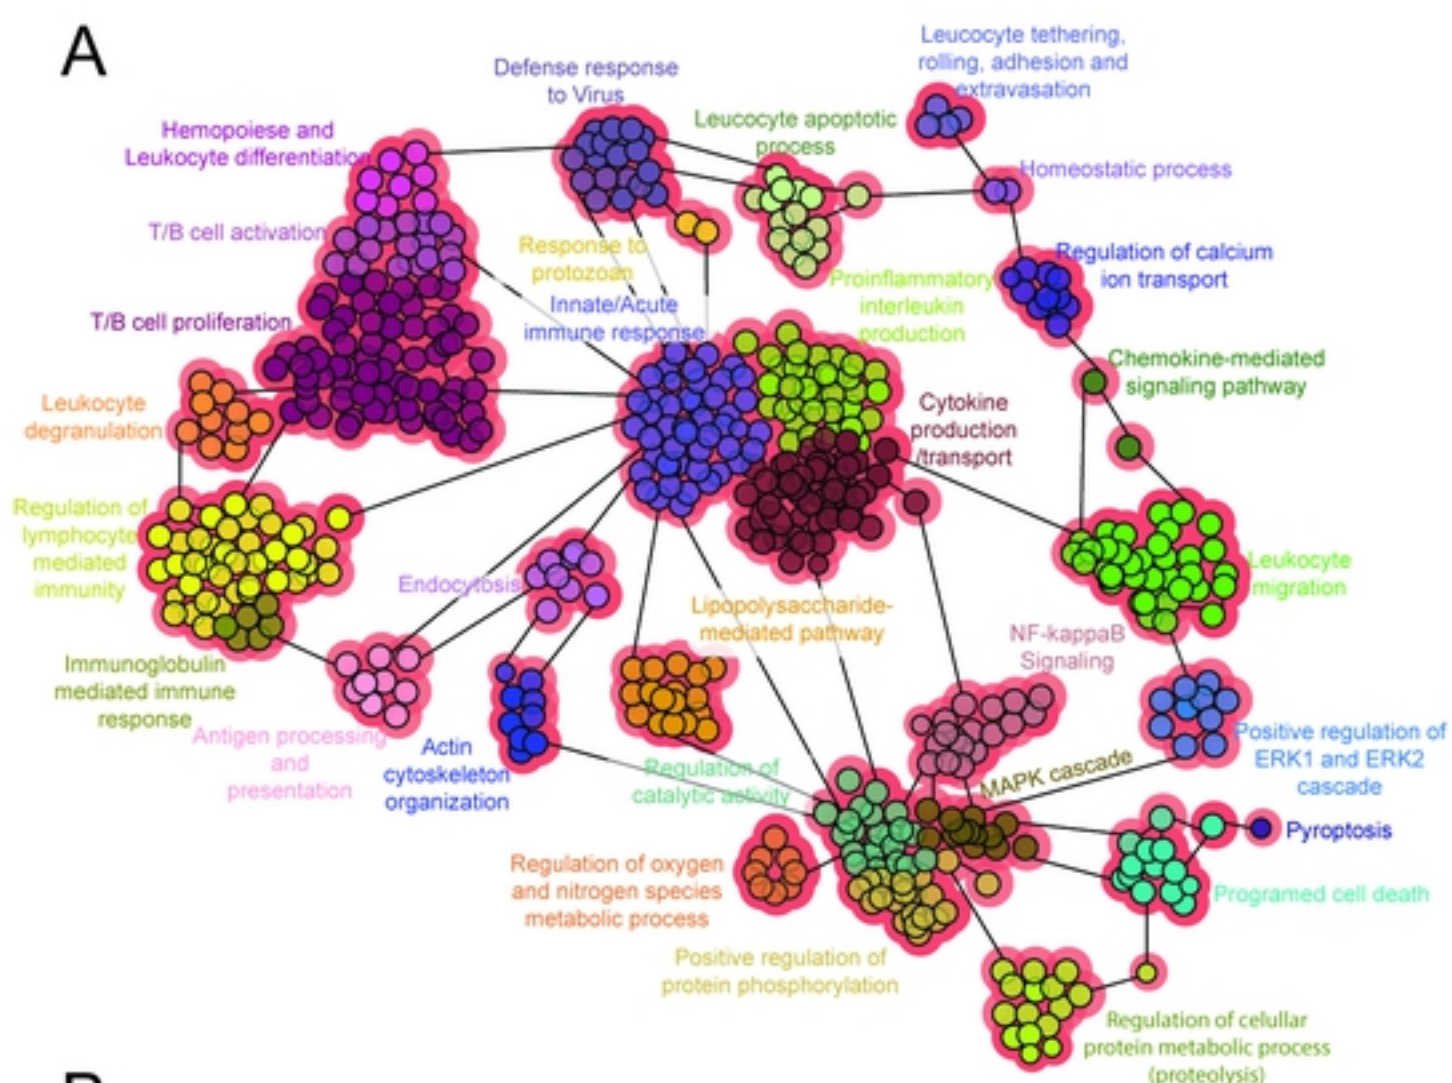

B

bioRxiv preprint doi: <https://doi.org/10.1101/574343>; this version posted March 11, 2019. The copyright holder for this preprint (which was not certified by peer review) is the author/funder, who has granted bioRxiv a license to display the preprint in perpetuity. It is made available under aCC-BY 4.0 International license.

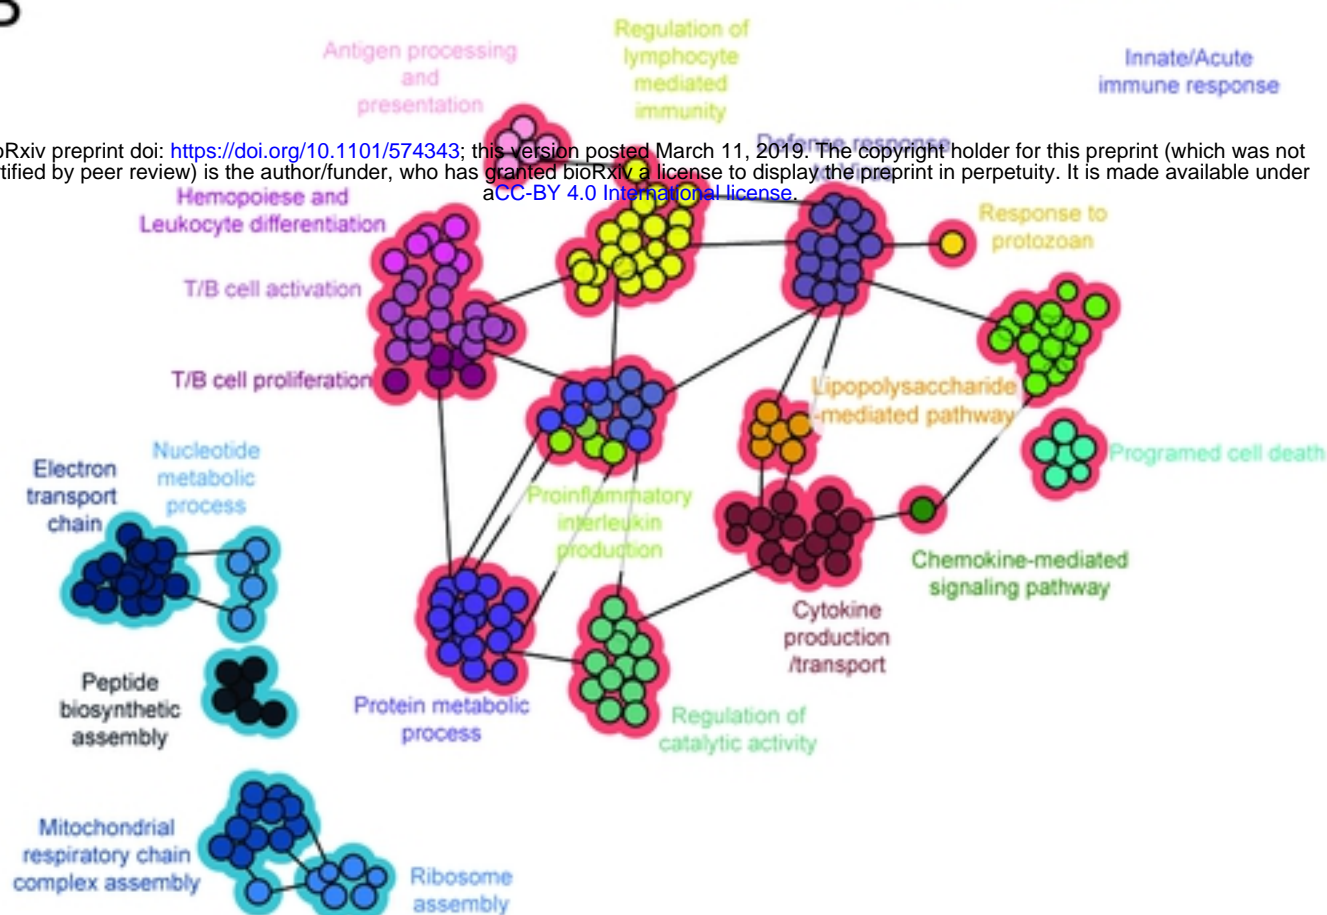

C

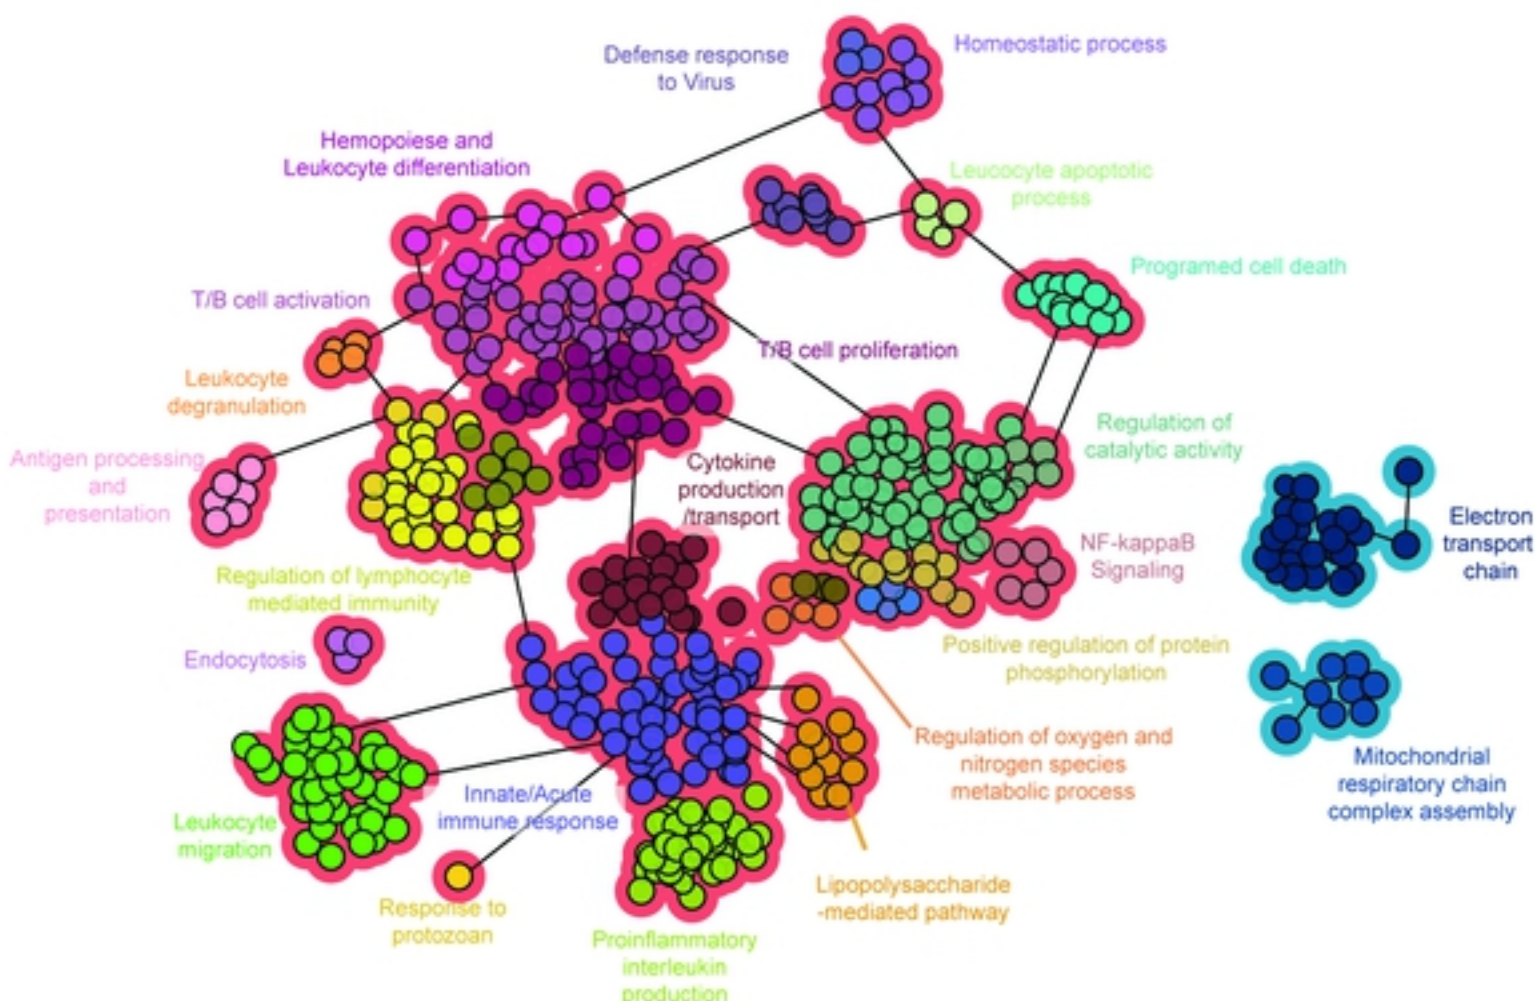

Figure 5

A

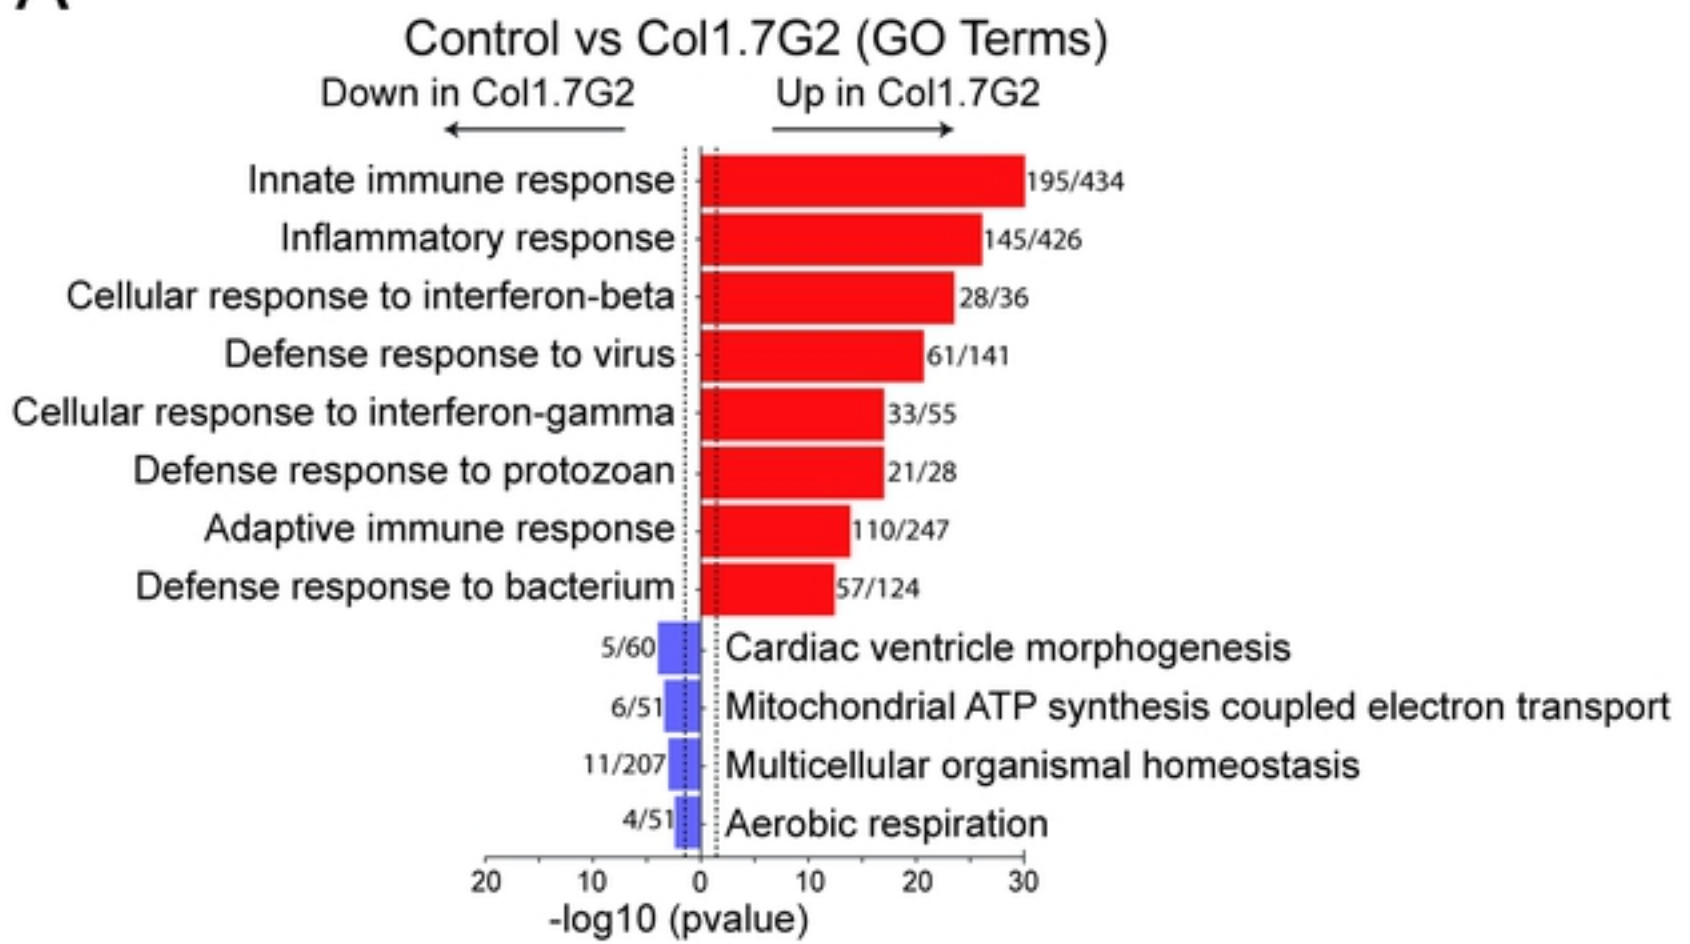

B

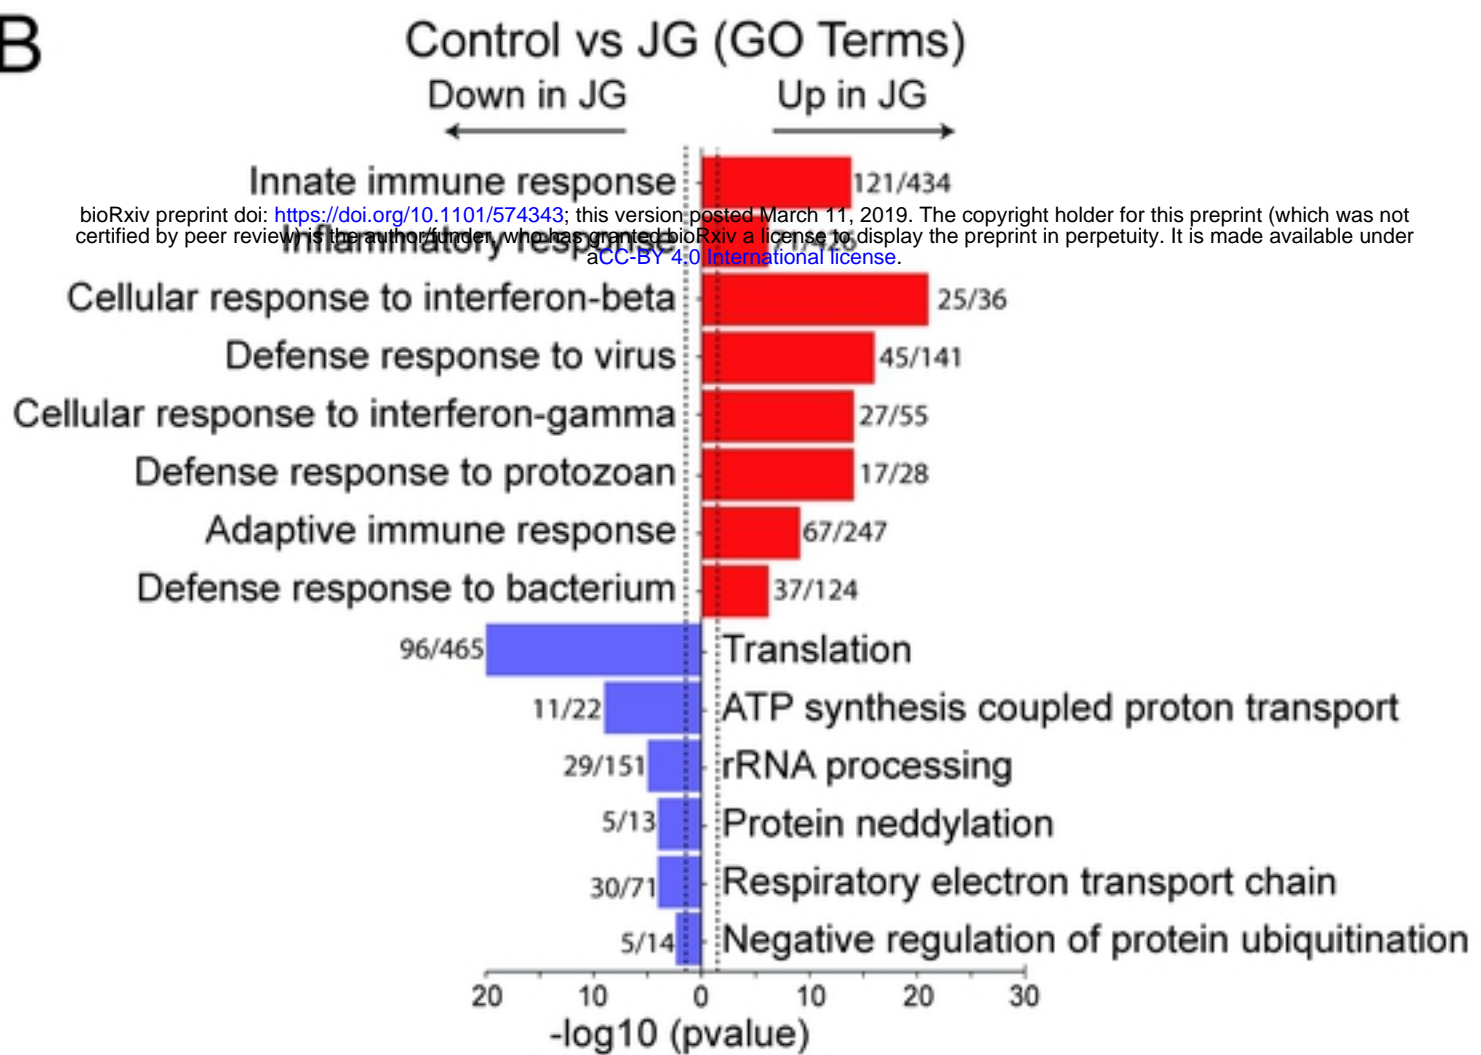

C

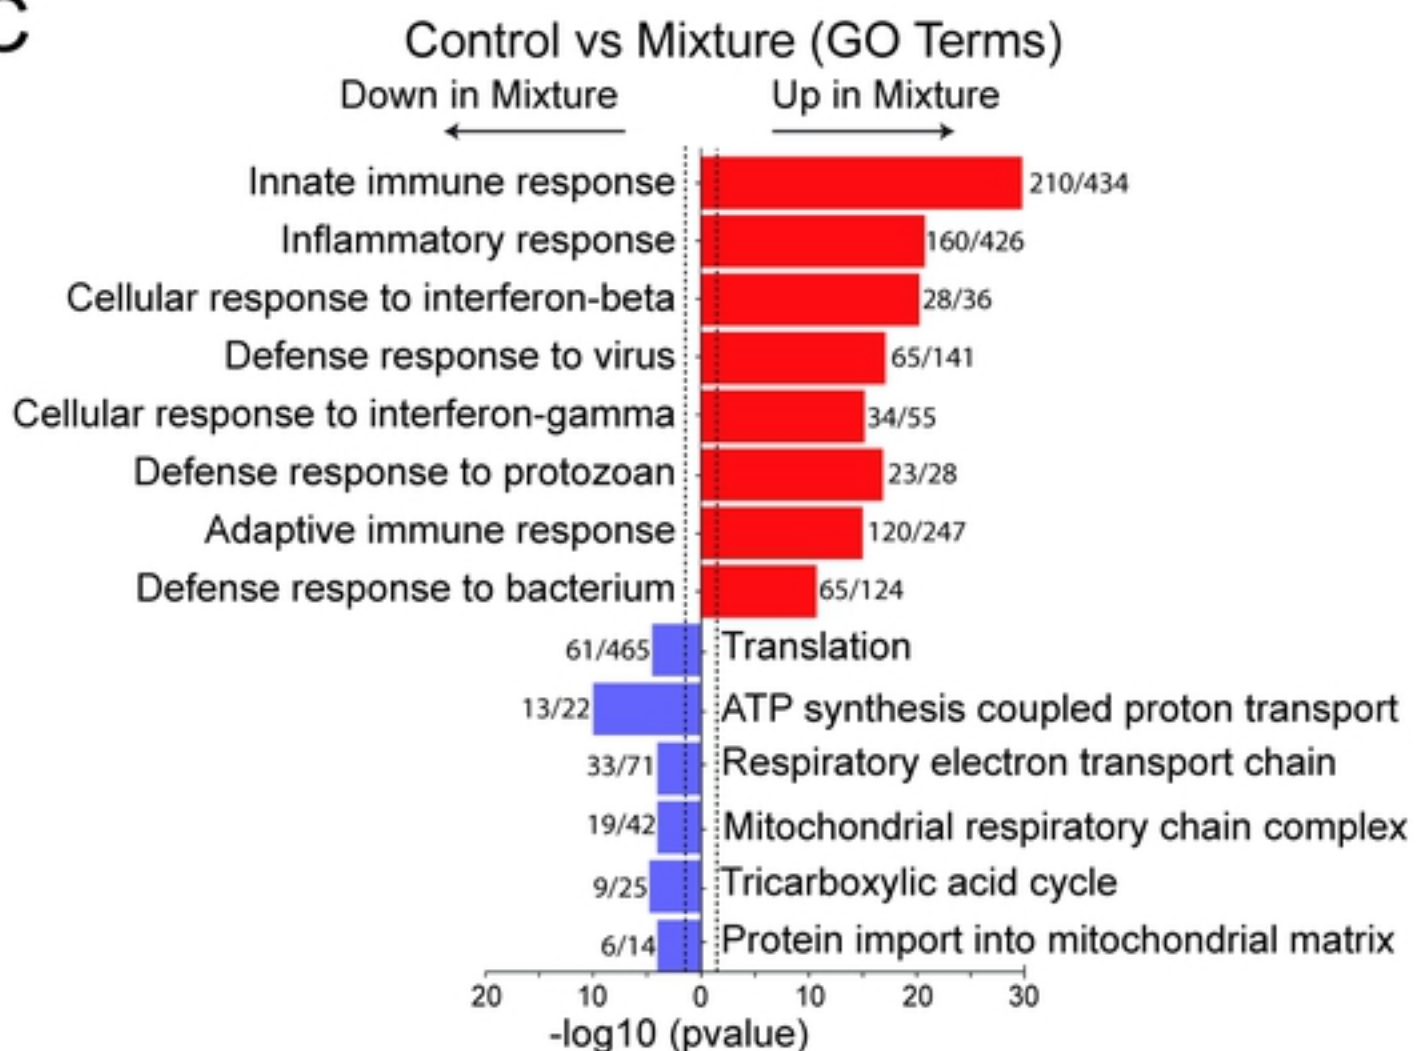

Figure 4

A

Ribosome Subunit genes FDR &lt; 0.01

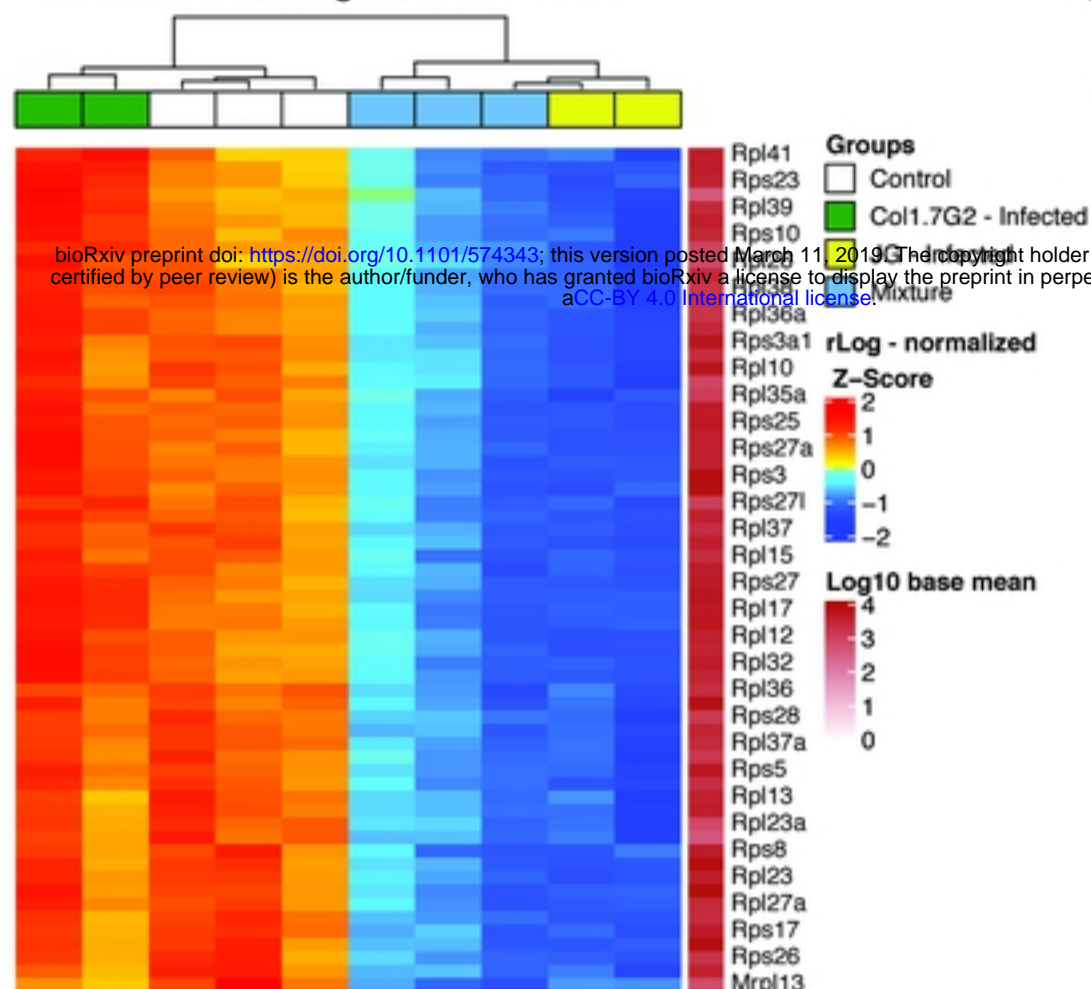

B

Oxidative phosphorylation genes FDR &lt; 0.01

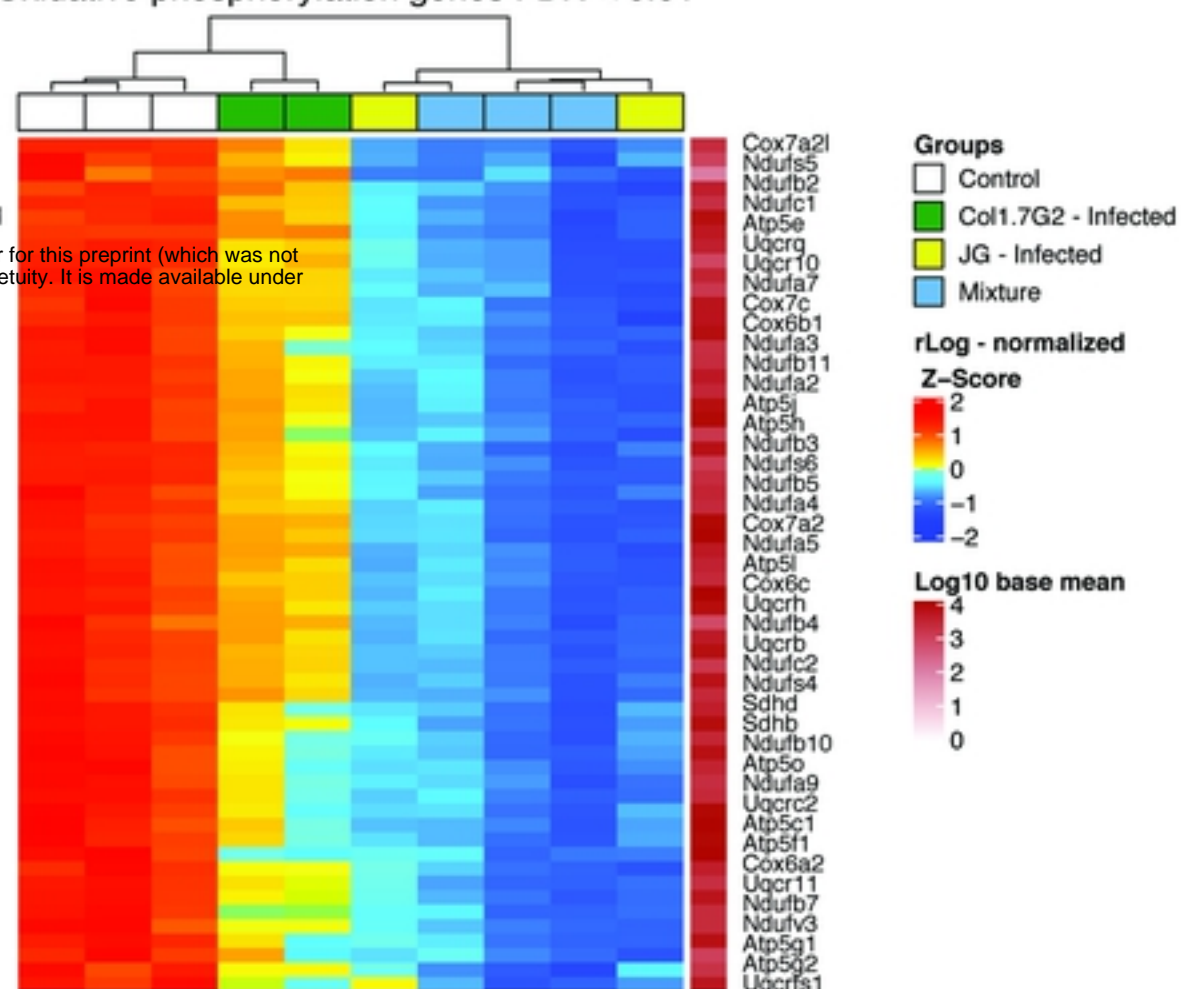

C

Chagas disease related genes FDR &lt; 0.01

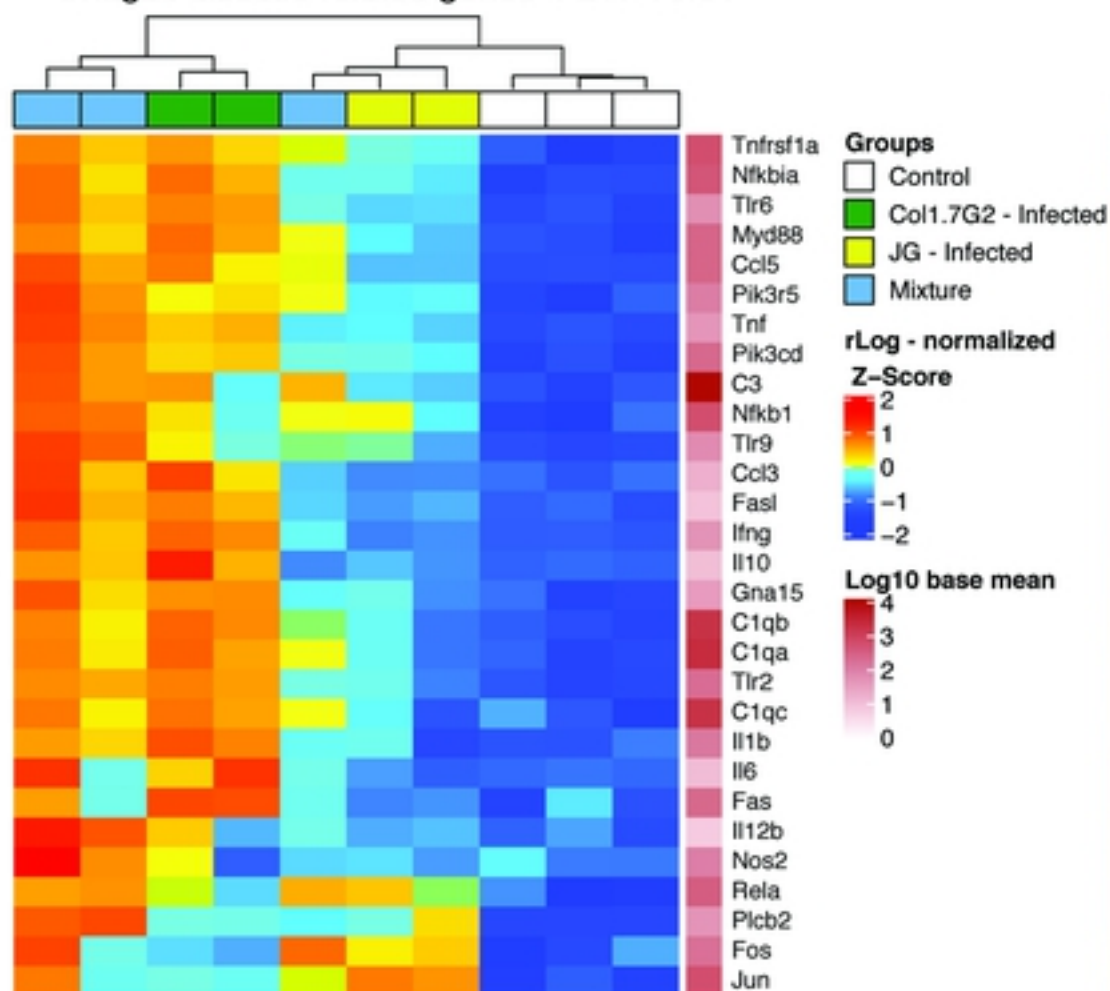

D

Chemokine signaling genes FDR &lt; 0.01

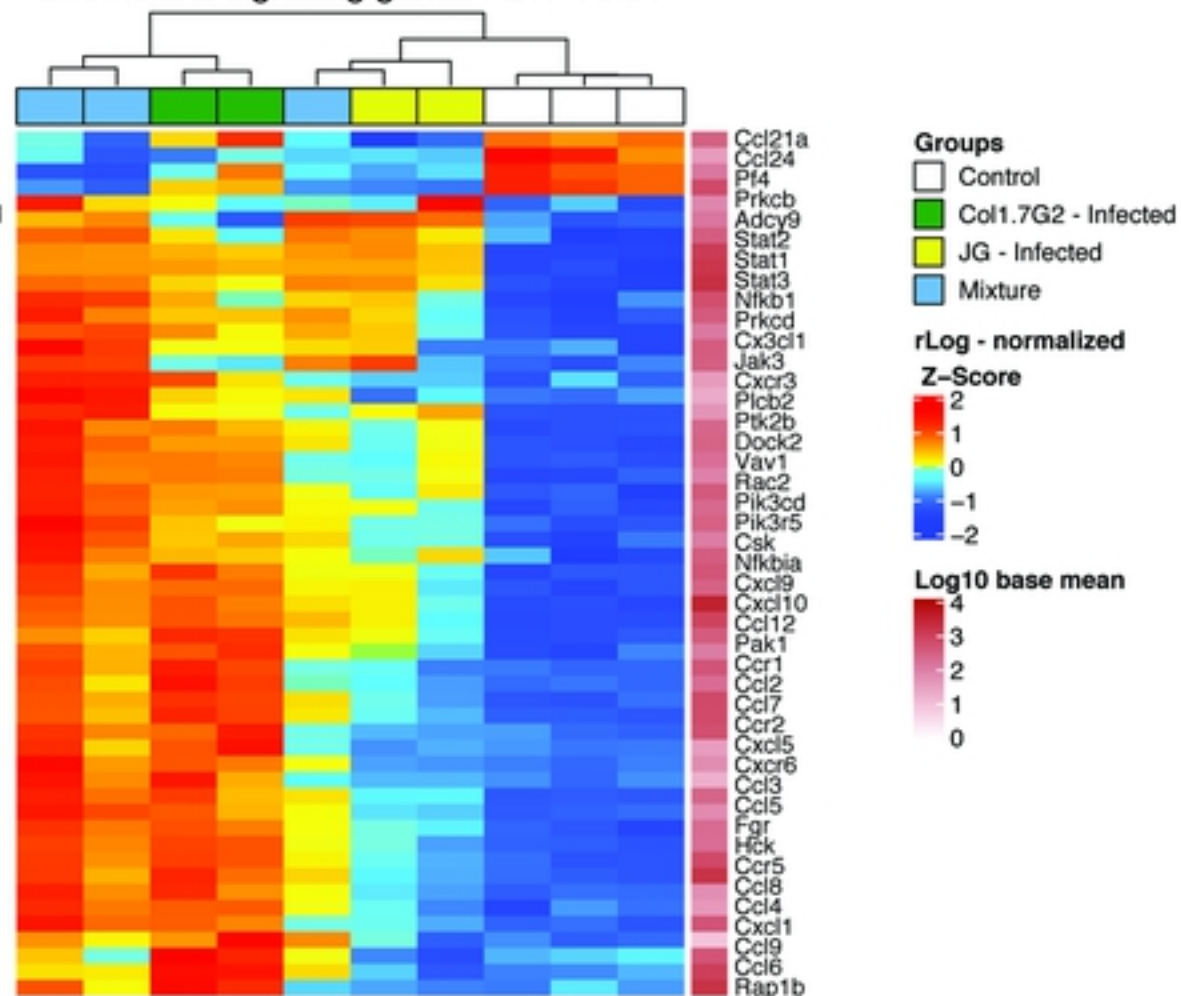

Figure 6

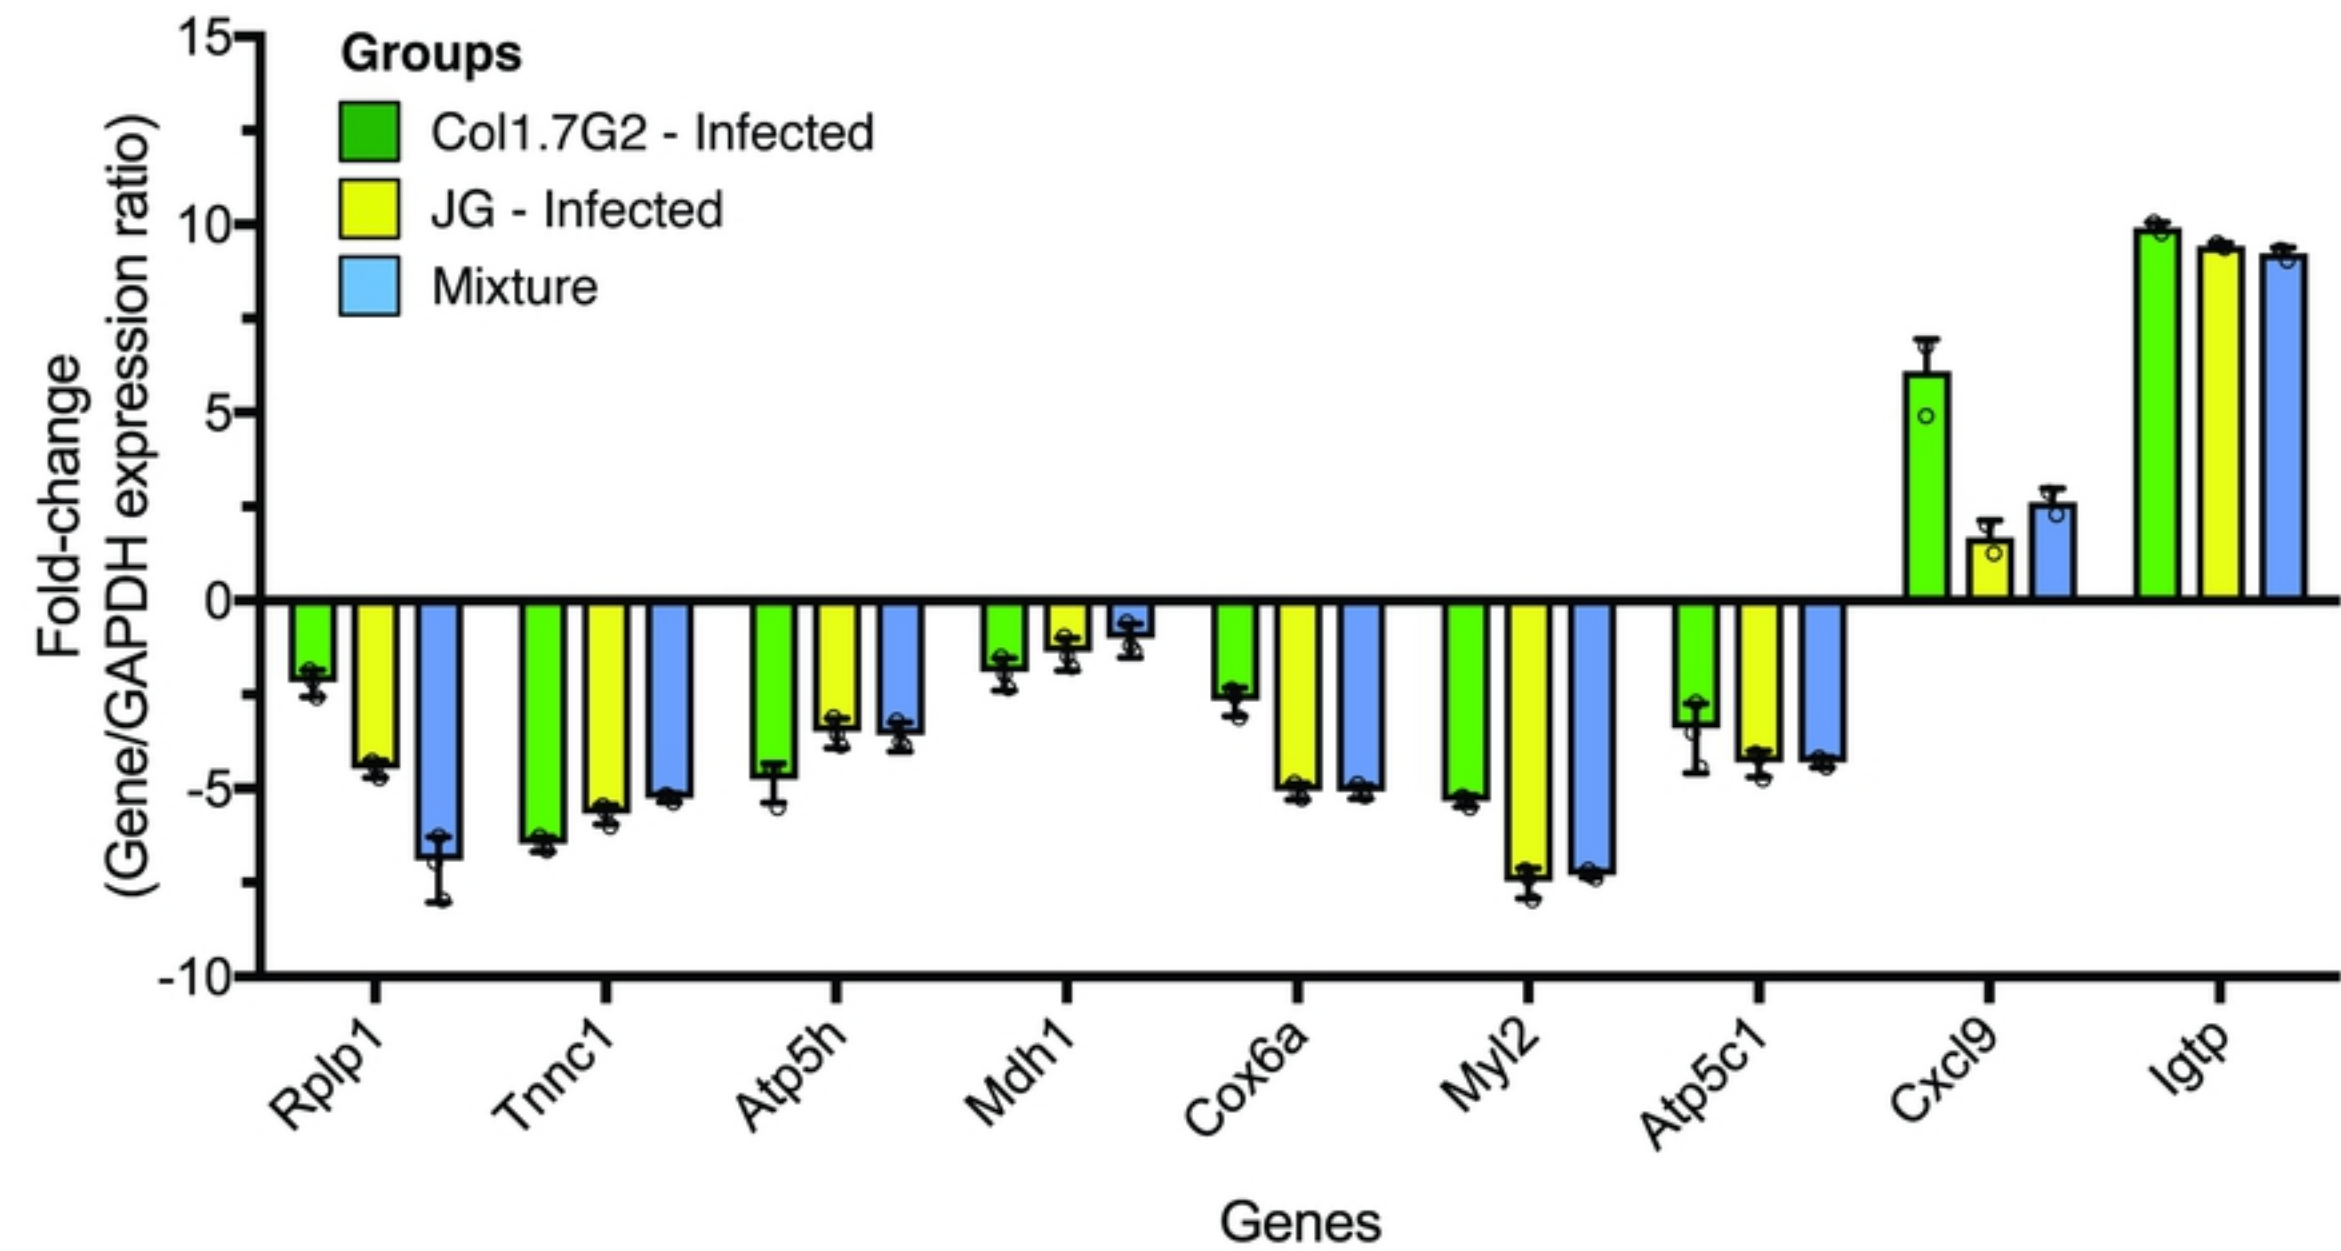

Figure 7

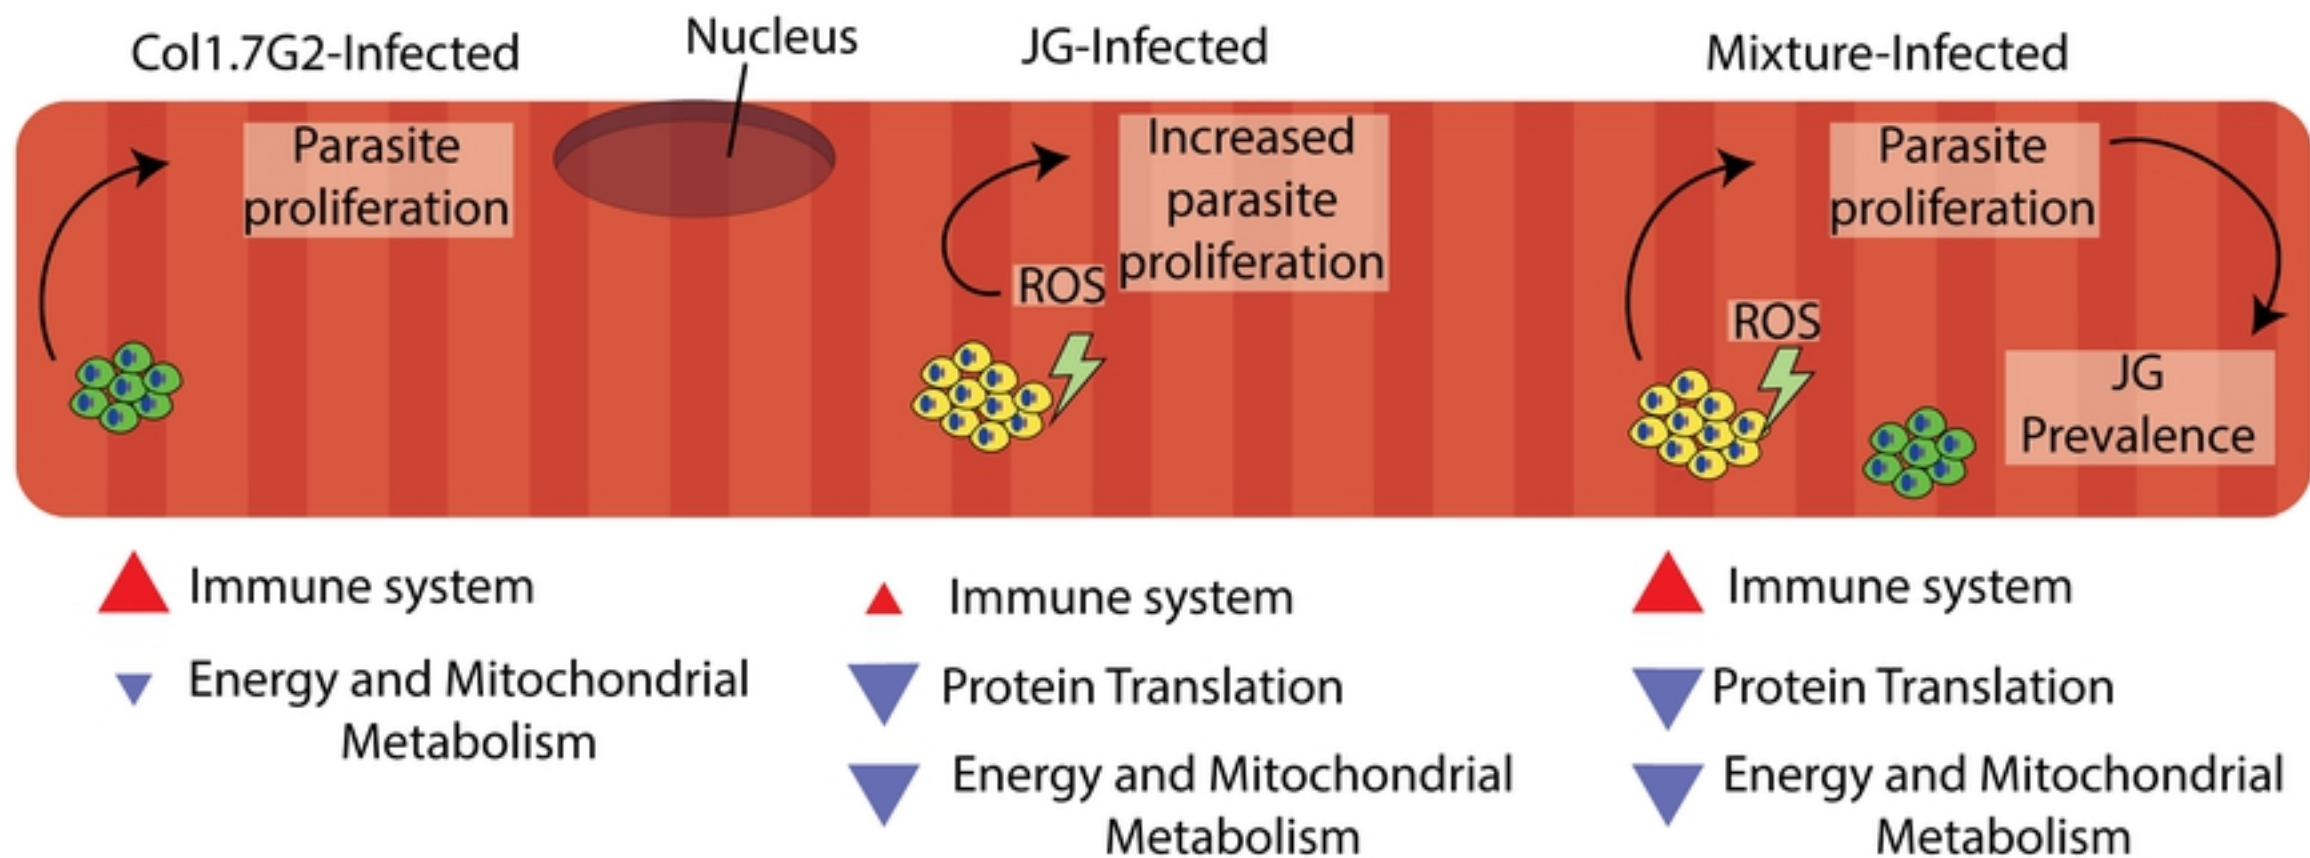

Figure 8
